# Supplementary material for: DUX4 Differentially Regulates Transcriptomes of Human Rhabdomyosarcoma and Mouse C2C12 Cells
Source: PLoS One. 2013 May 22;8(5):e64691. doi: 10.1371/journal.pone.0064691 (PMC3661531; doi:10.1371/journal.pone.0064691)
Supplement: Table S1 — Transcripts regulated by DUX4 in RD cells. RD cells transfected with DUX4 expression vector and insertless vector (control) were expression profiled and fold-changes of transcripts changed in response to ectopic DUX4 expression were calculated relative to control. Welch's t test was performed to calculate the probabilities of significant gene expression changes (p<0.05) along with multiple testing correction using Benjamini Hochberg False Discovery Rate (5%). (XLSX) [file pone.0064691.s001.xlsx]

## Sheet: Table S1
Table S1: Transcripts regulated by DUX4 in RD cells
Probe Set ID	Gene Symbol	Fold Change	Corrected p-value
1552456_a_at	MBD3L2	2804.6	0.000212
1553618_at	LOC653192 /// TRIM43	2319.9	0.00244004
1552851_at	ZSCAN4	2026.9	0.0022337
1553619_a_at	TRIM43	1800.4	0.00194244
207934_at	RFPL1	1231.1	0.000341
208312_s_at	PRAMEF1 /// PRAMEF13 /// PRAMEF2	1216.7	0.00305498
1552852_a_at	ZSCAN4	1064	0.000748
216001_at	PRAMEF12	710.7	0.00320814
220534_at	TRIM48	420.7	0.000166
221154_at	TRIM49	409.2	0.0133622
234470_at	hCG_1651160	400.1	0.0075445
207227_x_at	RFPL2	331.8	0.000667
220513_at	RP11-257K9.7	253.7	1.37e-05
207936_x_at	RFPL3	203.5	0.00288612
223975_at	SPRYD5	171.3	0.00409218
217365_at	PRAMEF11	125.8	2.7e-05
240731_at		102.2	0.000212
242896_at	C2orf21	82.1	0.00345626
214414_x_at	HBA1 /// HBA2	77.9	0.0142321
220784_s_at	UTS2	75.6	0.00873009
217414_x_at	HBA1 /// HBA2	67.9	0.000281
204018_x_at	HBA1 /// HBA2	62.5	0.000412
220895_at	USP29	56.4	0.00796749
238219_at	C12orf50	54.3	0.0028838
210431_at	ALPPL2	44.7	0.000743
204124_at	SLC34A2	40.2	0.0101611
234830_at	FLJ20518	38.4	0.00766539
234615_at		32.4	0.000375
209301_at	CA2	32.1	0.0124145
220535_at	FAM90A1	27.7	0.011929
209458_x_at	HBA1 /// HBA2	26.8	0.0218943
243036_at	RP4-692D3.1	21.5	0.0376253
216302_at	HNRNPC /// HNRNPCL1 /// LOC440563 /// LOC649330	20.1	0.000748
234898_at		19.9	0.000789
1569418_at		19.6	0.0153279
211699_x_at	HBA1 /// HBA2	19.5	0.00517485
211745_x_at	HBA1 /// HBA2	19.4	0.00719355
231385_at	DPPA3	16.7	0.000396
1557465_at	RP11-327P2.4	14.1	0.00517485
1564150_a_at	LOC256021	12.6	0.0358619
205899_at	CCNA1	12.4	3.01e-06
217273_at	PRAMEF10	11.9	0.017897
238607_at	ZNF296	9.1	0.00310194
239739_at	SNX24	6.8	0.00670165
232165_at	EPPK1	6.1	0.00791629
227985_at		5.8	0.0202314
243019_at	LOC100132207	5	0.0330004
205799_s_at	SLC3A1	4.8	0.00587855
231504_at	CCDC148	4.2	0.00448033
210089_s_at	LAMA4	3.9	0.00345409
205151_s_at	KIAA0644	3.9	0.0075445
237104_at		3.8	0.00367761
208399_s_at	EDN3	3.8	0.00429183
227467_at	RDH10	3.7	0.00180222
201695_s_at	NP	3.6	0.000944
205150_s_at	KIAA0644	3.6	0.000743
214761_at	ZNF423	3.5	0.0156193
219480_at	SNAI1	3.3	0.0343294
240076_at		3.1	0.0495252
206190_at	GPR17	3.1	0.0282567
208250_s_at	DMBT1	3.1	0.0424037
1554403_a_at		3	0.0125235
213152_s_at	SFRS2B	3	0.00244004
203887_s_at	THBD	3	0.000212
204770_at	TAP2	3	0.0432726
231051_at		3	0.00215422
206529_x_at	SLC26A4	3	0.0267414
204501_at	NOV	2.9	0.0201931
1556927_at	KCNK10	2.9	0.0147153
203888_at	THBD	2.9	0.00342186
236635_at	ZNF667	2.8	0.00265681
227300_at	TMEM119	2.8	0.0022236
237034_at		2.7	0.0217066
1558185_at	CLLU1	2.7	0.00854348
208056_s_at	CBFA2T3	2.7	0.0172247
206638_at	HTR2B	2.6	0.00429183
226021_at	RDH10	2.6	0.00168385
237753_at		2.6	0.00876773
1558613_at		2.6	0.0172383
213157_s_at	WSCD1	2.5	0.02971
236571_at		2.5	0.0124145
240244_at		2.5	0.0068279
214321_at	NOV	2.5	0.0108502
216034_at	ZNF280A	2.5	0.00539569
227410_at	FAM43A	2.5	0.0228035
215856_at	SIGLEC15	2.5	0.000885
218870_at	ARHGAP15	2.5	0.0112812
223179_at	YPEL3	2.5	0.0107905
207130_at	ZMYND8	2.4	0.0432726
44790_s_at	C13orf18 /// PPP1R2P4	2.4	0.0202604
237252_at	THBD	2.4	0.00502036
215028_at	SEMA6A	2.3	0.0133883
204533_at	CXCL10	2.3	0.0222944
214789_x_at	SFRS2B	2.3	0.000667
1558368_s_at	C1orf187	2.3	0.0197512
206348_s_at	PDK3	2.3	0.0376253
242301_at	CBLN2	2.3	0.0438698
204379_s_at	FGFR3	2.2	0.0222944
228081_at	CCNG2	2.2	0.0236809
208922_s_at	NXF1	2.2	0.0119796
207761_s_at	METTL7A	2.2	0.00914004
204639_at	ADA	2.2	0.00721467
218875_s_at	FBXO5	2.2	0.00831364
206657_s_at	MYOD1	2.2	0.00788565
213568_at	OSR2	2.2	0.0193853
217546_at	MT1M	2.2	0.0171504
1556346_at		2.2	0.0375303
216605_s_at	CEACAM21	2.2	0.0116156
225355_at	NEURL1B	2.2	0.00138298
236029_at	FAT3	2.2	0.0104464
1568742_at		2.2	0.0124145
209034_at	PNRC1	2.2	0.00774318
1561691_at	LOC285735	2.2	0.00300423
213880_at	LGR5	2.1	0.0151083
1552378_s_at	RDH10	2.1	0.0379007
204464_s_at	EDNRA	2.1	0.000827
209498_at	CEACAM1	2.1	0.0075445
209757_s_at	MYCN	2.1	0.0286673
212730_at	SYNM	2.1	0.000743
244142_at	DTNA	2.1	0.0397725
229638_at	IRX3	2.1	0.0214862
222278_at		2.1	0.0194329
212558_at	SPRY1	2.1	0.00153941
211039_at	CHRNA1	2.1	0.0331819
229190_at		2.1	0.0127472
223879_s_at	OXR1	2.1	0.00791629
203739_at	ZNF217	2.1	0.01479
220751_s_at	C5orf4	2	0.0300277
235964_x_at		2	0.0128995
239946_at		2	0.0291028
242759_at		2	0.0496395
1558487_a_at	TMED4	2	0.00356711
228501_at	GALNTL2	2	0.0456608
227526_at	CDON	2	0.00409218
226722_at	FAM20C	2	0.0232833
206363_at	MAF	2	0.00749912
212328_at	LIMCH1	2	0.0128123
225037_at	SLC35C2	2	0.0286673
213155_at	WSCD1	2	0.00911432
1554105_at	TMEM185A	2	0.00665034
209325_s_at	RGS16	2	0.0015065
202388_at	RGS2	2	0.000827
205967_at	HIST1H4C	2	0.0431931
204463_s_at	EDNRA	2	0.0432222
205158_at	RNASE4	2	0.0309439
90610_at	LRCH4	1.9	0.0122907
207282_s_at	MYOG	1.9	0.0122061
1555935_s_at	HUNK	1.9	0.00876773
201015_s_at	JUP	1.9	0.0202314
231229_at	HILS1	1.9	0.0108634
214180_at	MAN1C1	1.9	0.00636382
226636_at	PLD1	1.9	0.0246008
230746_s_at		1.9	0.0136844
225606_at	BCL2L11	1.9	0.00168385
209348_s_at	MAF	1.9	0.013874
202202_s_at	LAMA4	1.9	0.0129932
241873_at		1.9	0.0142321
230666_at	HOXA11AS	1.9	0.0475462
240690_at		1.9	0.043337
227226_at	MRAP2	1.9	0.00274667
209424_s_at	AMACR /// C1QTNF3	1.9	0.00561941
203213_at	CDC2	1.9	0.0297595
204364_s_at	REEP1	1.9	0.0214732
209324_s_at	RGS16	1.9	0.00492858
202497_x_at	SLC2A3	1.9	0.00636382
203214_x_at	CDC2	1.9	0.00288612
242715_at		1.9	0.0351846
206547_s_at	PPEF1	1.9	0.00194244
210559_s_at	CDC2	1.9	0.00216161
227997_at	IL17RD	1.9	0.00245696
220727_at	KCNK10	1.9	0.00535419
223523_at	TMEM108	1.9	0.0108634
205441_at	OCEL1	1.9	0.0172117
209230_s_at	NUPR1	1.9	0.0257319
212437_at	CENPB	1.9	0.0193853
229053_at	SYT17	1.9	0.0212558
227949_at	PHACTR3	1.9	0.015967
204756_at	MAP2K5	1.9	0.0172122
210846_x_at	TRIM14	1.9	0.0398404
220979_s_at	ST6GALNAC5	1.9	0.0304885
219106_s_at	KBTBD10	1.8	0.00759004
203708_at	PDE4B	1.8	0.00585114
225540_at	MAP2	1.8	0.0136844
230212_at	LOC729345	1.8	0.0217436
210657_s_at	2012-09-04	1.8	0.0300277
225274_at	PCYOX1	1.8	0.00563128
214058_at	MYCL1	1.8	0.0345967
1553971_a_at	GATS	1.8	0.0107364
204239_s_at	NNAT	1.8	0.0136844
219894_at	MAGEL2	1.8	0.0331365
206785_s_at	KLRC1 /// KLRC2	1.8	0.0065252
228607_at	OAS2	1.8	0.0154517
208937_s_at	ID1	1.8	0.00274667
226677_at	ZNF521	1.8	0.000885
1559867_at		1.8	0.0383898
230784_at	PRAC	1.8	0.0331118
200862_at	DHCR24	1.8	0.0222597
226884_at	LRRN1	1.8	0.00577241
232662_x_at	C10orf58	1.8	0.0408442
1562255_at	SYTL3	1.8	0.0349013
204109_s_at	NFYA	1.8	0.00517485
226913_s_at	SOX8	1.8	0.0222944
207069_s_at	SMAD6	1.8	0.00189991
230244_at	C2orf82	1.8	0.0187204
212282_at	TMEM97	1.8	0.00905308
204457_s_at	GAS1	1.8	0.00367761
201310_s_at	C5orf13	1.8	0.00244004
227092_at		1.8	0.0311017
212327_at	LIMCH1	1.8	0.0190473
226237_at		1.8	0.00310194
234987_at		1.8	0.00288612
1560477_a_at	SAMD11	1.8	0.0317549
203906_at	IQSEC1	1.8	0.040461
206373_at	ZIC1	1.8	0.0049595
231859_at	C14orf132	1.8	0.0215199
235601_at		1.8	0.0274604
232252_at	DUSP27	1.8	0.0193273
57715_at	CALHM2	1.8	0.00274667
209596_at	MXRA5	1.8	0.0222944
201141_at	GPNMB	1.8	0.00991074
209138_x_at	IGL@	1.8	0.0493044
218631_at	AVPI1	1.8	0.0281103
201202_at	PCNA	1.8	0.0045807
1556064_at	LOC284926	1.7	0.0468098
207018_s_at	RAB27B	1.7	0.0153698
222129_at	FAM134A	1.7	0.00245696
230498_at	MCHR1	1.7	0.0415243
228754_at	SLC6A6	1.7	0.00445478
228228_at	DACT3	1.7	0.0401762
211343_s_at	COL13A1	1.7	0.0192857
225990_at	BOC	1.7	0.0170561
244075_at		1.7	0.0122061
224954_at	SHMT1	1.7	0.0355228
233588_x_at	PFDN6	1.7	0.00661406
204975_at	EMP2	1.7	0.0321786
219904_at	ZSCAN5A	1.7	0.0141281
209608_s_at	ACAT2	1.7	0.00451971
209577_at	PCYT2	1.7	0.0144523
228674_s_at	EML4	1.7	0.0393726
226734_at	EIF4E2	1.7	0.00319278
228342_s_at	ALPK3	1.7	0.0144523
214177_s_at	PBXIP1	1.7	0.0296086
218032_at	SNN	1.7	0.00622333
216025_x_at	CYP2C9	1.7	0.0470176
228243_at		1.7	0.0470678
219537_x_at	DLL3	1.7	0.00838656
204595_s_at	STC1	1.7	0.0202314
229265_at	SKI	1.7	0.0365159
203498_at	RCAN2	1.7	0.00766539
219219_at	TMEM160	1.7	0.0305106
209652_s_at	PGF	1.7	0.0144371
217202_s_at	GLUL	1.7	0.00508033
222029_x_at	PFDN6	1.7	0.0160559
204365_s_at	REEP1	1.7	0.0184231
235595_at	ARHGEF2	1.7	0.0102458
201438_at	COL6A3	1.7	0.00310194
223322_at	RASSF5	1.7	0.0265727
225975_at	PCDH18	1.7	0.0383377
210038_at	PRKCQ	1.7	0.0221176
216237_s_at	MCM5	1.7	0.0441231
37892_at	COL11A1	1.7	0.0268574
1565329_at	POLE4	1.7	0.0208102
226436_at	RASSF4	1.7	0.0341219
201675_at	AKAP1	1.7	0.00376132
221783_at	WIZ	1.7	0.0203332
226191_at	GSK3B	1.7	0.0286673
212706_at	LOC100133005 /// RASA4	1.7	0.0170726
218918_at	MAN1C1	1.7	0.0222273
236400_at		1.7	0.0261476
209048_s_at	ZMYND8	1.7	0.0107607
230406_at		1.7	0.0286673
214033_at	ABCC6	1.7	0.0217436
205107_s_at	EFNA4	1.7	0.0222944
203188_at	B3GNT1	1.7	0.0127472
203706_s_at	FZD7	1.6	0.00469772
225390_s_at	KLF13	1.6	0.00911432
228217_s_at	PSMG4	1.6	0.0456608
213001_at	ANGPTL2	1.6	0.00706774
230647_at	TMEM53	1.6	0.0479985
201998_at	ST6GAL1	1.6	0.00398351
209343_at	EFHD1	1.6	0.0404268
1405_i_at	CCL5	1.6	0.0102418
208893_s_at	DUSP6	1.6	0.0190221
211940_x_at	H3F3A /// H3F3B /// LOC440926	1.6	0.00330308
235529_x_at		1.6	0.0383377
219103_at	ASAP3	1.6	0.0498023
224516_s_at	CXXC5	1.6	0.0296342
218384_at	CARHSP1	1.6	0.0142321
208644_at	PARP1	1.6	0.00905308
226811_at	FAM46C	1.6	0.0165739
218499_at	RP6-213H19.1	1.6	0.0426378
218501_at	ARHGEF3	1.6	0.0372074
213075_at	OLFML2A	1.6	0.0205721
210674_s_at	PCDHA1 /// PCDHA10 /// PCDHA11 /// PCDHA12 /// PCDHA13 /// PCDHA2 /// PCDHA3 /// PCDHA4 /// PCDHA5 /// PCDHA6 /// PCDHA7 /// PCDHA8 /// PCDHA9 /// PCDHAC1 /// PCDHAC2	1.6	0.0156228
231798_at	NOG	1.6	0.0305106
201674_s_at	AKAP1	1.6	0.0194329
223854_at	PCDHB10	1.6	0.0154009
238423_at	SYTL3	1.6	0.0433543
202283_at	SERPINF1	1.6	0.00457115
201627_s_at	INSIG1	1.6	0.0326916
204915_s_at	SOX11	1.6	0.0227928
239165_at		1.6	0.045531
64942_at	GPR153	1.6	0.0238515
221750_at	HMGCS1	1.6	0.0160559
1553220_at	FAM117B	1.6	0.0250634
230456_at		1.6	0.0247307
210524_x_at		1.6	0.0222273
204914_s_at	SOX11	1.6	0.0222944
204717_s_at	SLC29A2	1.6	0.0343167
204615_x_at	IDI1	1.6	0.0163423
202499_s_at	SLC2A3	1.6	0.000748
213650_at	GOLGA8A /// GOLGA8B	1.6	0.0360844
236270_at	NFATC4	1.6	0.0430467
209605_at	TST	1.6	0.0409425
227925_at	FLJ39051	1.6	0.0496973
227837_at	LOC729570	1.6	0.0243251
202869_at	OAS1	1.6	0.0122907
229365_at	PPP1R3F	1.6	0.0338228
1552754_a_at	CADM2	1.6	0.00837473
203229_s_at	CLK2	1.6	0.0224564
213058_at	TTC28	1.6	0.00356711
213293_s_at	TRIM22	1.6	0.0286673
239609_s_at	LPCAT4	1.6	0.0286673
208745_at	ATP5L	1.6	0.0290233
204320_at	COL11A1	1.6	0.0463317
222912_at	ARRB1	1.6	0.0328927
208956_x_at	DUT	1.6	0.00300423
213828_x_at	H3F3A /// H3F3B /// LOC440926	1.6	0.0127472
213524_s_at	G0S2	1.6	0.0425184
212812_at		1.6	0.0126668
201185_at	HTRA1	1.6	0.0127472
214695_at	UBAP2L	1.6	0.00791012
205481_at	ADORA1	1.6	0.0111982
203390_s_at	KIF3C	1.6	0.0156055
204451_at	FZD1	1.6	0.00854348
201292_at	TOP2A	1.6	0.0365159
228488_at	TBC1D16	1.6	0.0247041
238617_at		1.6	0.0205721
212096_s_at	MTUS1	1.6	0.0235792
212148_at	PBX1	1.6	0.0187452
218974_at	SOBP	1.6	0.0363422
231759_at	TAL2	1.6	0.00911432
209969_s_at	STAT1	1.6	0.0166918
224772_at	NAV1	1.6	0.0150438
226676_at	ZNF521	1.6	0.0179706
223044_at	SLC40A1	1.6	0.00905308
202478_at	TRIB2	1.6	0.00367761
205505_at	GCNT1	1.6	0.0187335
205330_at	MN1	1.6	0.0452161
219169_s_at	TFB1M	1.6	0.0179328
213227_at	PGRMC2	1.6	0.00660696
219990_at	E2F8	1.6	0.00290357
224690_at	C20orf108	1.6	0.00670785
224836_at	TP53INP2	1.6	0.0264226
201043_s_at	ANP32A /// LOC100128146	1.6	0.0311017
212992_at	AHNAK2	1.6	0.0281085
201499_s_at	USP7	1.6	0.00460816
211569_s_at	HADH	1.6	0.0108634
228075_x_at	TFB1M	1.6	0.0040627
202540_s_at	HMGCR	1.6	0.0142347
209018_s_at	PINK1	1.6	0.0432726
205534_at	PCDH7	1.6	0.0202439
214838_at	SFT2D2	1.6	0.0127472
235010_at	LOC729013	1.6	0.0334743
214994_at	APOBEC3F	1.6	0.0421742
207332_s_at	TFRC	1.6	0.0405245
210950_s_at	FDFT1	1.6	0.0111922
228944_at		1.6	0.0261735
205436_s_at	H2AFX	1.6	0.0424037
48808_at	DHFR	1.6	0.0398709
215008_at	TLL2	1.6	0.0203286
210202_s_at	BIN1	1.5	0.0178203
209932_s_at	DUT	1.5	0.0133763
242842_at		1.5	0.0427492
209049_s_at	ZMYND8	1.5	0.00420703
209699_x_at	AKR1C2	1.5	0.0102621
205677_s_at	DLEU1	1.5	0.0121611
225313_at	C20orf177	1.5	0.0124145
225222_at	HIAT1	1.5	0.00274667
222996_s_at	CXXC5	1.5	0.0228035
228301_x_at	NDUFB10	1.5	0.00603184
235122_at	HIVEP3	1.5	0.00447492
224608_s_at	VPS25	1.5	0.0487858
238529_at	LOC730631	1.5	0.0130571
202245_at	LSS	1.5	0.0247041
228890_at	ATOH8	1.5	0.00996438
219471_at	C13orf18 /// PPP1R2P4	1.5	0.0183087
204613_at	PLCG2	1.5	0.0193714
205817_at	SIX1	1.5	0.0454591
219100_at	OBFC1	1.5	0.0127472
1556285_s_at	PPA2	1.5	0.00501823
209146_at	SC4MOL	1.5	0.0156502
225772_s_at	C12orf62	1.5	0.0321089
200732_s_at	PTP4A1	1.5	0.0323241
213125_at	OLFML2B	1.5	0.00859629
226990_at	CAPRIN1	1.5	0.0133622
202588_at	AK1	1.5	0.0252572
212183_at	NUDT4	1.5	0.040461
204439_at	IFI44L	1.5	0.0264877
204168_at	MGST2	1.5	0.00876773
208755_x_at	H3F3A /// H3F3B /// LOC440926	1.5	0.0163526
212158_at	SDC2	1.5	0.02971
214755_at	UAP1L1	1.5	0.0201209
228151_at		1.5	0.0359329
218380_at	NLRP1	1.5	0.0322202
201461_s_at	MAPKAPK2	1.5	0.0112812
222867_s_at	MED31	1.5	0.032834
223075_s_at	AIF1L	1.5	0.0085719
202815_s_at	HEXIM1	1.5	0.0366464
204067_at	SUOX	1.5	0.0245353
1554114_s_at	SSH2	1.5	0.0165739
205660_at	OASL	1.5	0.0271255
212414_s_at	N-PAC /// SEPT6	1.5	0.00245696
213133_s_at	GCSH	1.5	0.00837461
209461_x_at	WDR18	1.5	0.0359899
201441_at	COX6B1	1.5	0.0150133
209829_at	FAM65B	1.5	0.0168492
227178_at	CUGBP2	1.5	0.0413563
213050_at	COBL	1.5	0.00752493
214285_at	FABP3	1.5	0.0479985
216236_s_at	SLC2A14 /// SLC2A3	1.5	0.00898141
228034_x_at	ALKBH5	1.5	0.0421439
241224_x_at	DSCR8	1.5	0.0183087
213797_at	RSAD2	1.5	0.0422614
222879_s_at	POLH	1.5	0.0405245
239824_s_at	TMEM107	1.5	0.0333086
211959_at	IGFBP5	1.5	0.0440829
223361_at	C6orf115	1.5	0.0222944
214211_at	FTH1	1.5	0.0170549
218665_at	FZD4	1.5	0.00534064
211730_s_at	POLR2L	1.5	0.0328043
219330_at	VANGL1	1.5	0.00952893
204159_at	CDKN2C	1.5	0.0107607
1569076_a_at	ZNF836	1.5	0.0381418
239377_at	EIF1AD	1.5	0.021472
235252_at	KSR1	1.5	0.0192347
210220_at	FZD2	1.5	0.0352996
1555852_at		1.5	0.0469413
202562_s_at	C14orf1	1.5	0.00353216
1562403_a_at	SLC8A3	1.5	0.0395278
208699_x_at	TKT	1.5	0.0323243
226319_s_at	THOC4	1.5	0.0223914
225079_at	EMP2	1.5	0.0118802
219863_at	HERC5	1.5	0.0144371
1561141_at		1.5	0.045035
214298_x_at	2012-09-06	1.5	0.0144523
226702_at	CMPK2	1.5	0.0160559
227052_at		1.5	0.00721467
228750_at		1.5	0.0239611
233955_x_at	CXXC5	1.5	0.032393
228640_at	PCDH7	1.5	0.0410477
219008_at	C2orf43	1.5	0.0234195
238727_at		1.5	0.0360844
234295_at	DBR1	1.5	0.0318531
209204_at	LMO4	1.5	0.0223781
205825_at	PCSK1	1.5	0.0218943
226820_at	ZNF362	1.5	0.0224966
209658_at	CDC16	1.5	0.0272873
219506_at	C1orf54	1.5	0.0218943
208647_at	FDFT1	1.5	0.00391471
227525_at	GLCCI1	1.5	0.0246008
218736_s_at	PALMD	1.5	0.0337146
223524_s_at	TMEM108	1.5	0.0274604
202446_s_at	PLSCR1	1.5	0.00314444
1552364_s_at	MSI2	1.5	0.0316867
201847_at	LIPA	1.5	0.0212192
228773_at		1.5	0.02511
203217_s_at	ST3GAL5	1.5	0.0186533
202554_s_at	GSTM3	1.5	0.0267034
217999_s_at	PHLDA1	1.5	0.0222944
235850_at	WDR5B	1.5	0.0348395
204590_x_at	VPS33A	1.5	0.0379002
210367_s_at	PTGES	1.5	0.0300506
212281_s_at	TMEM97	1.5	0.00282932
234974_at	GALM	1.5	0.0437746
227959_at		1.5	0.0271563
230240_at		1.5	0.0342305
229302_at	TMEM178	1.5	0.0469961
222450_at	PMEPA1	1.5	0.0193273
216215_s_at	RBM9	1.5	0.0352996
228885_at	MAMDC2	1.5	0.0216434
37943_at	ZFYVE26	1.5	0.0323241
210797_s_at	OASL	1.5	0.0321786
201701_s_at	PGRMC2	1.5	0.0492208
1555037_a_at	IDH1	1.5	0.00138298
208892_s_at	DUSP6	1.5	0.00425787
202539_s_at	HMGCR	1.5	0.0130571
228155_at	C10orf58	1.5	0.00447492
220739_s_at	CNNM3	1.5	0.0222944
244732_at		1.5	0.0244699
209205_s_at	LMO4	1.5	0.0151083
209213_at	CBR1	1.5	0.038121
212279_at	TMEM97	1.5	0.00827847
203477_at	COL15A1	1.5	0.0234195
203705_s_at	FZD7	1.5	0.00310194
227243_s_at	EBF3	1.5	0.0358194
223396_at	TMEM60	1.5	0.00996336
209279_s_at	NSDHL	1.5	0.00585114
227094_at	DHTKD1	1.5	0.0497473
233059_at		1.5	0.0283167
212181_s_at	NUDT4 /// NUDT4P1	1.5	0.0240647
238622_at	RAP2B	1.5	0.0389263
217908_s_at	IQWD1	1.5	0.0194329
208691_at	TFRC	1.5	0.0152411
207630_s_at	CREM	1.5	0.000944
208626_s_at	VAT1	1.5	0.0439841
242481_at		1.5	0.0147109
201275_at	FDPS	1.5	0.0165739
200648_s_at	GLUL	1.5	0.021084
204643_s_at	ENOX2	1.5	0.0111877
213004_at	ANGPTL2	1.5	0.0150041
227479_at	KIAA1244	1.5	0.00619148
210416_s_at	CHEK2	1.5	0.0299718
221985_at	KLHL24	1.5	0.0321786
236106_at		1.5	0.0259788
204588_s_at	SLC7A7	1.5	0.0121107
208700_s_at	TKT	1.5	0.0305106
211023_at	PDHB	1.5	0.000743
240363_at	ANK1	1.5	0.0222944
210976_s_at	PFKM	1.5	0.0197069
213629_x_at	MT1F	1.5	0.0184231
212865_s_at	COL14A1	1.5	0.0386768
200640_at	YWHAZ	1.4	0.0119552
222273_at	PAPOLG	1.4	0.0314419
226197_at		1.4	0.0353899
228120_at		1.4	0.0223672
219816_s_at	RBM23	1.4	0.01479
206858_s_at	HOXC6	1.4	0.0342805
242878_at		1.4	0.0149133
212651_at	RHOBTB1	1.4	0.00460816
224435_at	C10orf58	1.4	0.0341492
228653_at	SAMD5	1.4	0.0438681
226320_at	THOC4	1.4	0.0141281
202981_x_at	SIAH1	1.4	0.0431931
208742_s_at	SAP18	1.4	0.0118368
223915_at	BCOR	1.4	0.0286673
212560_at	SORL1	1.4	0.0155107
227327_at	MEGF8	1.4	0.0413082
224890_s_at	C7orf59	1.4	0.0469961
228347_at	SIX1	1.4	0.0163423
202565_s_at	SVIL	1.4	0.0161249
201309_x_at	C5orf13	1.4	0.0111877
201910_at	FARP1	1.4	0.0445626
1569052_at		1.4	0.0424037
200955_at	IMMT	1.4	0.0123994
201193_at	IDH1	1.4	0.0280945
201625_s_at	INSIG1	1.4	0.0197512
226010_at	SLC25A23	1.4	0.0254395
224724_at	SULF2	1.4	0.0326252
1553593_a_at	TAL2	1.4	0.0231655
203083_at	THBS2	1.4	0.0308588
203335_at	PHYH	1.4	0.028311
211784_s_at	SFRS1	1.4	0.01479
217553_at	MGC87042	1.4	0.0169467
205449_at	SAC3D1	1.4	0.0415243
211423_s_at	SC5DL	1.4	0.0355121
214252_s_at	CLN5	1.4	0.0491668
32137_at	JAG2	1.4	0.0434392
211370_s_at	MAP2K5	1.4	0.00587855
212320_at	TUBB	1.4	0.0403023
218424_s_at	STEAP3	1.4	0.0360121
213521_at	PTPN18	1.4	0.0338228
209917_s_at	TP53TG1	1.4	0.0489143
218269_at	RNASEN	1.4	0.0145311
227618_at		1.4	0.0414949
239292_at		1.4	0.0142321
221599_at	C11orf67	1.4	0.0248217
200701_at	NPC2	1.4	0.0281103
227145_at	LOXL4	1.4	0.0350045
202783_at	NNT	1.4	0.0434829
218285_s_at	BDH2	1.4	0.00937879
212949_at	NCAPH	1.4	0.0352951
1556389_at	CNPY3	1.4	0.0494073
227966_s_at	CCDC74A /// CCDC74B	1.4	0.01479
226860_at	TMEM19	1.4	0.00152799
223435_s_at	PCDHA1 /// PCDHA10 /// PCDHA11 /// PCDHA12 /// PCDHA13 /// PCDHA2 /// PCDHA3 /// PCDHA4 /// PCDHA5 /// PCDHA6 /// PCDHA7 /// PCDHA8 /// PCDHA9 /// PCDHAC1 /// PCDHAC2	1.4	0.0147568
221911_at	ETV1	1.4	0.0275478
228384_s_at	PYROXD2	1.4	0.0288411
221485_at	B4GALT5	1.4	0.00367761
1559048_at		1.4	0.0426756
226958_s_at	MED11	1.4	0.0328043
204832_s_at	BMPR1A	1.4	0.0274604
231767_at	HOXB4	1.4	0.0441231
242157_at	CHD9	1.4	0.0417571
229578_at	JPH2	1.4	0.0496395
229761_at	LOC440173	1.4	0.00441946
219667_s_at	BANK1	1.4	0.0261075
227046_at	SLC39A11	1.4	0.0342305
208955_at	DUT	1.4	0.00854348
204820_s_at	BTN3A2 /// BTN3A3	1.4	0.00407131
242873_at		1.4	0.0186533
202931_x_at	BIN1	1.4	0.0331246
218678_at	NES	1.4	0.0111922
204698_at	ISG20	1.4	0.0465211
243762_at		1.4	0.0110426
200604_s_at	PRKAR1A	1.4	0.018344
226011_at	CCDC12	1.4	0.0109671
227522_at	CMBL	1.4	0.0486881
203031_s_at	UROS	1.4	0.0363044
217188_s_at	C14orf1	1.4	0.0187335
222039_at	KIF18B	1.4	0.0340811
209189_at	FOS	1.4	0.00914004
221290_s_at	MUM1	1.4	0.0342305
233825_s_at	CD99L2	1.4	0.0468098
205990_s_at	WNT5A	1.4	0.0366346
209630_s_at	FBXW2	1.4	0.0338228
218434_s_at	AACS	1.4	0.0360758
218839_at	HEY1	1.4	0.00244004
213073_at	ZFYVE26	1.4	0.0291624
213617_s_at	C18orf10	1.4	0.0348729
235094_at		1.4	0.032834
231130_at	FKBP7	1.4	0.0442574
225556_at	VMA21	1.4	0.0421439
201528_at	RPA1	1.4	0.0128008
232406_at		1.4	0.0289969
208608_s_at	SNTB1	1.4	0.0364733
204086_at	PRAME	1.4	0.00460816
227941_at	LOC339803	1.4	0.0130571
225078_at	EMP2	1.4	0.0233209
205822_s_at	HMGCS1	1.4	0.039805
200069_at	SART3	1.4	0.0176956
209581_at	PLA2G16	1.4	0.0459346
204478_s_at	RABIF	1.4	0.0205264
215096_s_at	ESD	1.4	0.0234136
205738_s_at	FABP3	1.4	0.0202314
207826_s_at	ID3	1.4	0.0379002
222931_s_at	THNSL1	1.4	0.0133424
204849_at	TCFL5	1.4	0.0165739
212801_at	CIT	1.4	0.0438698
227197_at	SGEF	1.4	0.0199806
224719_s_at	C12orf57	1.4	0.0389781
226419_s_at	FLJ44342	1.4	0.0303451
205573_s_at	SNX7	1.4	0.0144044
212423_at	ZCCHC24	1.4	0.0222944
200762_at	DPYSL2	1.4	0.00869789
226006_at	LOC100131801	1.4	0.0370624
219837_s_at	CYTL1	1.4	0.0367678
209270_at	LAMB3	1.4	0.0153067
213599_at	OIP5	1.4	0.0164195
207173_x_at	CDH11	1.4	0.0409047
1570511_at	ARHGEF10L	1.4	0.0432786
242625_at	RSAD2	1.4	0.02911
219637_at	ARMC9	1.4	0.0342114
223474_at	C14orf4	1.4	0.0259957
201942_s_at	CPD	1.4	0.0197067
223042_s_at	FUNDC2	1.4	0.0107607
200832_s_at	SCD	1.4	0.0127472
231725_at	PCDHB2	1.4	0.00837461
209218_at	SQLE	1.4	0.0102418
226936_at	C6orf173	1.4	0.0166194
226456_at	C16orf75	1.4	0.0328043
235472_at	FUT10	1.4	0.0313196
224602_at	C4orf3	1.4	0.0313033
235134_at		1.4	0.0133864
212098_at	LOC151162 /// MGAT5	1.4	0.0217982
207350_s_at	VAMP4	1.4	0.0203332
203974_at	HDHD1A	1.4	0.0156055
200658_s_at	PHB	1.4	0.0198338
212094_at	PEG10	1.4	0.0212752
204068_at	STK3	1.4	0.0440235
203183_s_at	SMARCD1	1.4	0.0183087
223354_x_at	MFF	1.4	0.0305106
217983_s_at	RNASET2	1.4	0.0477134
218117_at	RBX1	1.4	0.0285747
226288_s_at	NLGN2	1.4	0.0411147
219093_at	PID1	1.4	0.0239213
214051_at	TMSB15B	1.4	0.0448919
224604_at	C4orf3	1.4	0.0158949
231897_at	PTGR1	1.4	0.0328043
217061_s_at	ETV1	1.4	0.0409389
229949_at		1.4	0.0263815
219142_at	RASL11B	1.4	0.0215199
204655_at	CCL5	1.4	0.0409389
203297_s_at	JARID2	1.4	0.0136844
204254_s_at	VDR	1.4	0.0127472
208771_s_at	LTA4H	1.4	0.00409218
225145_at	NCOA5	1.4	0.0201649
223457_at	COPG2	1.4	0.00502036
213772_s_at	GGA2	1.4	0.0435724
201969_at	NASP	1.4	0.0178769
203735_x_at	PPFIBP1	1.4	0.0273189
211762_s_at	KPNA2	1.3	0.0402216
202950_at	CRYZ	1.3	0.0197069
205053_at	PRIM1	1.3	0.0108634
223475_at	CRISPLD1	1.3	0.0305106
1555889_a_at	CRTAP	1.3	0.0156585
218611_at	IER5	1.3	0.0193273
223125_s_at	C1orf21	1.3	0.0397836
204747_at	IFIT3	1.3	0.0424037
219308_s_at	AK5	1.3	0.0424037
225297_at	HAUS1	1.3	0.0127472
212858_at	PAQR4	1.3	0.0332125
209109_s_at	TSPAN6	1.3	0.0252572
44783_s_at	HEY1	1.3	0.0239213
227049_at	ZADH2	1.3	0.0372794
223294_at	CXorf26	1.3	0.00749511
1566557_at	FLJ90757	1.3	0.0434829
231968_at	UGCGL1	1.3	0.00544168
224901_at	SCD5	1.3	0.0424037
211729_x_at	BLVRA	1.3	0.0256881
223242_s_at	MFSD11	1.3	0.039722
218259_at	MKL2	1.3	0.0223074
242655_at		1.3	0.0486709
242138_at	DLX1	1.3	0.0190221
226542_at		1.3	0.0434392
210829_s_at	SSBP2	1.3	0.0387752
227878_s_at	ALKBH7	1.3	0.0430467
229549_at		1.3	0.0140627
229014_at	FLJ42709	1.3	0.0261476
229145_at	C10orf104	1.3	0.0289563
217761_at	ADI1	1.3	0.0120661
221024_s_at	SLC2A10	1.3	0.0496395
227109_at	CYP2R1	1.3	0.0127472
217165_x_at	MT1F	1.3	0.0426378
38241_at	BTN3A3	1.3	0.0395878
204690_at	STX8	1.3	0.0222944
201061_s_at	STOM	1.3	0.011929
224368_s_at	NDRG3	1.3	0.0215199
219636_s_at	ARMC9	1.3	0.0432222
209224_s_at	NDUFA2	1.3	0.0254395
213780_at	TCHH	1.3	0.0389905
222482_at	LOC100131851 /// LOC100134497 /// LOC401002 /// LOC646674 /// SSBP3	1.3	0.0291624
210766_s_at	CSE1L	1.3	0.0288093
213616_at	C18orf10	1.3	0.0185641
212372_at	MYH10	1.3	0.0192009
1561908_a_at	HS3ST3B1	1.3	0.0323794
203787_at	SSBP2	1.3	0.00665034
203744_at	HMGB3	1.3	0.0384192
212458_at	SPRED2	1.3	0.0187335
51774_s_at	LOC222070	1.3	0.0418458
204612_at	PKIA	1.3	0.0474277
205538_at	CORO2A	1.3	0.0432222
228059_x_at	MRPS22	1.3	0.0224059
219352_at	HERC6	1.3	0.0241831
227328_at	CAMTA1	1.3	0.0216434
212793_at	DAAM2	1.3	0.0144523
235005_at	DIS3L	1.3	0.01479
223721_s_at	DNAJC12	1.3	0.021084
218048_at	COMMD3	1.3	0.0262863
218597_s_at	CISD1	1.3	0.0283763
225525_at	CTA-221G9.4	1.3	0.0352996
223839_s_at	SCD	1.3	0.0174633
212413_at	2012-09-06	1.3	0.0225554
225532_at	CABLES1	1.3	0.0340466
209389_x_at	DBI	1.3	0.0491579
212912_at	RPS6KA2	1.3	0.0438419
211161_s_at	COL3A1	1.3	0.00859629
204011_at	SPRY2	1.3	0.0124404
202733_at	P4HA2	1.3	0.0434829
227719_at	SMAD9	1.3	0.0389905
224415_s_at	HINT2	1.3	0.0469413
238026_at	RPL35A	1.3	0.0354041
235256_s_at	GALM	1.3	0.038866
218024_at	BRP44L	1.3	0.0153153
201036_s_at	HADH	1.3	0.00684525
212260_at	GIGYF2	1.3	0.0442574
208212_s_at	ALK	1.3	0.01676
201214_s_at	PPP1R7	1.3	0.0375009
227085_at	H2AFV	1.3	0.0257533
224002_s_at	FKBP7	1.3	0.0186533
205535_s_at	PCDH7	1.3	0.0183087
201209_at	HDAC1	1.3	0.00869789
201303_at	EIF4A3	1.3	0.0140546
202447_at	DECR1	1.3	0.00902045
203633_at	CPT1A	1.3	0.0193784
201467_s_at	NQO1	1.3	0.0424037
217764_s_at	RAB31	1.3	0.0128284
222447_at	METTL9	1.3	0.0338724
226891_at	C3orf21	1.3	0.0277756
231579_s_at	TIMP2	1.3	0.0422518
210149_s_at	ATP5H	1.3	0.0382283
218412_s_at	GTF2IRD1	1.3	0.0256568
226386_at	C7orf30	1.3	0.045224
224248_x_at	NIP30	1.3	0.0361693
217896_s_at	NIP30	1.3	0.0244307
203069_at	SV2A	1.3	0.0494273
202954_at	UBE2C	1.3	0.0476337
205132_at	ACTC1	1.3	0.0127472
223100_s_at	NUDT5	1.3	0.0326898
222388_s_at	VPS35	1.3	0.0100229
226823_at	PHACTR4	1.3	0.0280019
224774_s_at	NAV1	1.3	0.018462
225802_at	TOP1MT	1.3	0.0398943
225897_at	MARCKS	1.3	0.0438698
222403_at	MTCH2	1.3	0.0132398
215691_x_at	HSPB11	1.3	0.039722
211935_at	ARL6IP1	1.3	0.0153279
200711_s_at	SKP1	1.3	0.0395022
221483_s_at	ARPP19	1.3	0.0215199
224637_at	LOC100128731	1.3	0.0454048
52975_at	FAM125B	1.3	0.0179955
200863_s_at	RAB11A	1.3	0.0467894
219512_at	DSN1	1.3	0.0413774
213578_at	BMPR1A	1.3	0.0441242
1555372_at	BCL2L11	1.3	0.032834
218879_s_at	MTHFSD	1.3	0.0204058
229371_at		1.3	0.0480691
216945_x_at	PASK	1.3	0.0494273
210466_s_at	SERBP1	1.3	0.0497475
235692_at	SH3KBP1	1.3	0.0397836
213762_x_at	RBMX	1.3	0.0381908
230493_at	SHISA2	1.3	0.00876862
203775_at	SLC25A13	1.3	0.022944
212154_at	SDC2	1.3	0.0210716
218477_at	TMEM14A	1.3	0.0177475
208146_s_at	CPVL	1.3	0.0222273
203187_at	DOCK1	1.3	0.0492208
223441_at	SLC17A5	1.3	0.0220264
217122_s_at	RP11-345P4.4	1.3	0.0325061
222781_s_at	C9orf40	1.3	0.0297866
212547_at	BRD3	1.3	0.0254395
217763_s_at	RAB31	1.3	0.0286531
209377_s_at	HMGN3	1.3	0.0493044
223690_at	LTBP2	1.3	0.0295789
51146_at	PIGV	1.3	0.0224363
228824_s_at	PTGR1	1.3	0.0235662
207469_s_at	PIR	1.3	0.0306753
226474_at	NLRC5	1.3	0.0412883
209621_s_at	PDLIM3	1.3	0.0301427
225351_at	FAM45A	1.3	0.00991074
212149_at	EFR3A	1.3	0.023065
201468_s_at	NQO1	1.3	0.0305106
226959_at	LOC283070	1.3	0.0441231
222401_s_at	TMEM50A	1.3	0.0493044
202208_s_at	ARL4C	1.3	0.0222944
226348_at		1.3	0.0434829
219043_s_at	LOC285359 /// PDCL3	1.3	0.045224
212517_at	ATRN	1.3	0.00587855
219497_s_at	BCL11A	1.3	0.0434473
233334_x_at	GIYD1 /// GIYD2 /// SULT1A3 /// SULT1A4	1.3	0.0451242
212407_at	METTL13	1.3	0.0277524
217900_at	IARS2	1.3	0.0327959
226157_at	TFDP2	1.3	0.0321786
203964_at	NMI	1.3	0.0397828
1557966_x_at	MTERFD2	1.3	0.0477591
209762_x_at	SP110	1.3	0.0474277
209492_x_at	ATP5I	1.3	0.0277524
207438_s_at	SNUPN	1.3	0.0104128
228000_at	ADC	1.3	0.0490339
208846_s_at	VDAC3	1.3	0.0164195
200847_s_at	TMEM66	1.3	0.00991074
201311_s_at	SH3BGRL	1.3	0.0291075
201529_s_at	RPA1	1.3	0.0402173
204082_at	PBX3	1.3	0.0303451
202207_at	ARL4C	1.3	0.00319278
242414_at	QPRT	1.3	0.00869789
219283_at	C1GALT1C1	1.3	0.0128375
202941_at	NDUFV2	1.3	0.0411147
224752_at	PL-5283	1.3	0.016731
205173_x_at	CD58	1.3	0.0359899
224937_at	PTGFRN	1.2	0.0353372
210519_s_at	NQO1	1.2	0.0323794
225455_at	TADA1L	1.2	0.0104464
222019_at	PFDN6	1.2	0.0127472
209290_s_at	NFIB	1.2	0.0151083
203814_s_at	NQO2	1.2	0.0222944
211980_at	COL4A1	1.2	0.0250634
210993_s_at	SMAD1	1.2	0.027191
203320_at	SH2B3	1.2	0.00914675
205880_at	PRKD1	1.2	0.0489692
221479_s_at	BNIP3L	1.2	0.00519557
209170_s_at	GPM6B	1.2	0.0279706
228990_at	SNHG12	1.2	0.0197512
201611_s_at	ICMT	1.2	0.0271065
209576_at	GNAI1	1.2	0.0409389
218824_at	PNMAL1	1.2	0.00716768
209708_at	MOXD1	1.2	0.0283368
218350_s_at	GMNN	1.2	0.0164684
213366_x_at	ATP5C1	1.2	0.0277756
201931_at	ETFA	1.2	0.0398709
233168_s_at	RP3-402G11.5	1.2	0.0215762
225583_at	UXS1	1.2	0.00518953
235099_at	CMTM8	1.2	0.0331365
227705_at	TCEAL7	1.2	0.048765
200850_s_at	AHCYL1	1.2	0.0365159
200757_s_at	CALU	1.2	0.0375009
203621_at	NDUFB5	1.2	0.0218943
214334_x_at	DAZAP2	1.2	0.0421718
210986_s_at	TPM1	1.2	0.0187335
206140_at	LHX2	1.2	0.024366
212597_s_at	HMGXB4	1.2	0.0160969
226642_s_at	NUDCD2	1.2	0.00765826
213090_s_at	TAF4	1.2	0.0108634
208727_s_at	CDC42	1.2	0.0163423
224345_x_at	FAM162A	1.2	0.0262341
210337_s_at	ACLY	1.2	0.0424306
202442_at	AP3S1	1.2	0.0165739
211988_at	SMARCE1	1.2	0.0247041
209095_at	DLD	1.2	0.0276238
202769_at	CCNG2	1.2	0.0274604
225152_at	ZNF622	1.2	0.0342805
209507_at	RPA3	1.2	0.0426982
221107_at	CHRNA9	1.2	0.0328043
223157_at	C4orf14	1.2	0.0305653
221620_s_at	APOO	1.2	0.0376253
212361_s_at	ATP2A2	1.2	0.0202069
218837_s_at	UBE2D4	1.2	0.046427
223728_at	MGC16385	1.2	0.0215555
200972_at	TSPAN3	1.2	0.0254395
211115_x_at	SIP1	1.2	0.0202648
225036_at	SHB /// TOMM5	1.2	0.0127472
226965_at	FAM116A	1.2	0.0253628
225676_s_at	WDSOF1	1.2	0.0441231
227708_at	EEF1A1	1.2	0.00431443
218102_at	DERA	1.2	0.0389263
203361_s_at	MYCBP	1.2	0.0415243
212605_s_at		1.2	0.0212752
222862_s_at	AK5	1.2	0.0363874
201555_at	MCM3	1.2	0.0432222
1556216_s_at		1.2	0.0416433
224711_at	YY1	1.2	0.0179706
223177_at	NT5DC1	1.2	0.0435649
206302_s_at	NUDT4 /// NUDT4P1	1.2	0.0225125
208911_s_at	PDHB	1.2	0.0190329
201578_at	PODXL	1.2	0.0438698
222468_at	KIAA0319L	1.2	0.0374079
226490_at	NHSL1	1.2	0.0494273
223159_s_at	NEK6	1.2	0.0424037
1554577_a_at	PSMD10	1.2	0.0252572
221847_at	LOC100129361	1.2	0.00592358
208950_s_at	ALDH7A1	1.2	0.0216434
224630_at	C2orf30	1.2	0.0229367
226296_s_at	MRPS15	1.2	0.0325061
206751_s_at	PCYT1B	1.2	0.0348184
203476_at	TPBG	1.2	0.0140255
223490_s_at	EXOSC3	1.2	0.0191761
225022_at	GOPC	1.2	0.0390931
221041_s_at	SLC17A5	1.2	0.0450247
238465_at	C5orf35	1.2	0.00409218
208847_s_at	ADH5	1.2	0.0166398
212596_s_at	HMGXB4	1.2	0.0247041
203656_at	FIG4	1.2	0.032393
217809_at	BZW2	1.2	0.0130363
227960_s_at	FAHD1	1.2	0.0270349
239443_at	PCDHB6	1.2	0.0135426
226515_at	CCDC127	1.2	0.038866
211985_s_at	CALM1	1.2	0.0239714
226764_at	ZNF827	1.2	0.0438698
200665_s_at	SPARC	1.2	0.0442514
212667_at	SPARC	1.2	0.0496395
225415_at	DTX3L	1.2	0.0208102
207040_s_at	ST13	1.2	0.0127472
201762_s_at	PSME2	1.2	0.035704
202128_at	KIAA0317	1.2	0.0386495
228555_at	CAMK2D	1.2	0.0328271
201890_at	RRM2	1.2	0.00791012
204962_s_at	CENPA	1.2	0.0301427
226077_at	RNF145	1.2	0.00587559
208739_x_at	SUMO2	1.2	0.0375009
213061_s_at	NTAN1	1.2	0.00660391
202164_s_at	CNOT8	1.2	0.040461
201886_at	WDR23	1.2	0.0342805
204710_s_at	WIPI2	1.2	0.0468225
218217_at	SCPEP1	1.2	0.02971
220239_at	KLHL7	1.2	0.0432491
205176_s_at	ITGB3BP	1.2	0.0451395
219289_at	HEATR3	1.2	0.0323794
210580_x_at	SULT1A3 /// SULT1A4	1.2	0.0411147
40189_at	SET	1.2	0.0272194
224869_s_at	MRPS25	1.2	0.0345691
212334_at	GNS	1.1	0.0144371
212321_at	SGPL1	1.1	0.0493044
200893_at	TRA2B	1.1	0.0477134
205282_at	LRP8	1.1	0.0368515
219060_at	WDYHV1	1.1	0.0190289
216640_s_at	PDIA6	1.1	0.0473374
1555844_s_at	HNRNPM	1.1	0.0324438
202336_s_at	PAM	1.1	0.0313196
217848_s_at	PPA1	1.1	0.0493044
208642_s_at	XRCC5	1.1	0.00756665
209194_at	CETN2	1.1	0.00872112
208848_at	ADH5	1.1	0.0438698
213545_x_at	SNX3	1.1	0.0186533
209001_s_at	ANAPC13	1.1	0.0424037
203721_s_at	UTP18	1.1	0.0191449
218946_at	NFU1	1.1	0.00282932
225681_at	CTHRC1	1.1	0.0421743
219449_s_at	TMEM70	1.1	0.0148312
208743_s_at	YWHAB	1.1	0.0432491
201457_x_at	BUB3	1.1	0.0424037
218622_at	NUP37	1.1	0.0369478
223334_at	TMEM126A	1.1	0.0378289
210987_x_at	TPM1	1.1	0.0342305
225515_s_at	LOC220906 /// RPL7L1	-1.1	0.0281501
203517_at	MTX2	-1.1	0.0193273
224660_at	PIGY	-1.1	0.0418458
208787_at	MRPL3	-1.1	0.0191236
201097_s_at	ARF4	-1.1	0.0321786
62212_at	C1orf50	-1.1	0.0424037
203209_at	RFC5	-1.1	0.0127472
222875_at	DHX33	-1.1	0.0374079
204576_s_at	CLUAP1	-1.1	0.0206581
225827_at	EIF2C2	-1.1	0.0333168
201047_x_at	RAB6A	-1.1	0.0486875
209572_s_at	EED	-1.1	0.0291075
209069_s_at	H3F3B	-1.1	0.0338724
224729_s_at	ATPAF1	-1.1	0.00958656
203972_s_at	PEX3	-1.2	0.0172247
203534_at	LSM1	-1.2	0.0468832
208898_at	ATP6V1D	-1.2	0.0444975
218497_s_at	RNASEH1	-1.2	0.0460786
1554482_a_at	SAR1B	-1.2	0.0423913
204589_at	NUAK1	-1.2	0.0452161
231861_at	LRP10	-1.2	0.045224
204033_at	TRIP13	-1.2	0.0489796
210793_s_at	NUP98	-1.2	0.0121116
211475_s_at	BAG1	-1.2	0.0405975
209817_at	PPP3CB	-1.2	0.0301526
203406_at	MFAP1	-1.2	0.045224
225973_at	TAP2	-1.2	0.0153067
223518_at	DFFA	-1.2	0.0488427
201323_at	EBNA1BP2	-1.2	0.0466733
212502_at	ADO	-1.2	0.0296022
227481_at	CNKSR3	-1.2	0.0426325
227373_at	ATXN1L	-1.2	0.0267414
222441_x_at	SLMO2	-1.2	0.0144523
222452_s_at	GPBP1L1	-1.2	0.0208102
219108_x_at	DDX27 /// SS18	-1.2	0.0422518
225470_at	NUP35	-1.2	0.0325061
227160_s_at	C20orf7	-1.2	0.0487457
225319_s_at	FAM104A	-1.2	0.0108634
216268_s_at	JAG1	-1.2	0.0158798
222680_s_at	DTL	-1.2	0.0421742
205891_at	ADORA2B	-1.2	0.0373067
228992_at	MED28	-1.2	0.0305106
200691_s_at	HSPA9	-1.2	0.0395022
224430_s_at	MTO1	-1.2	0.00873009
1554167_a_at	GOLGA7	-1.2	0.0493044
235747_at	SLC25A16	-1.2	0.0181375
233186_s_at	BANP	-1.2	0.0331365
209501_at	CDR2	-1.2	0.0305695
204141_at	TUBB2A	-1.2	0.0164195
201594_s_at	PPP4R1	-1.2	0.0376253
207842_s_at	CASC3	-1.2	0.0194329
225991_at	TMEM41A	-1.2	0.0428658
224217_s_at	FAF1	-1.2	0.00577241
232057_at	SLC7A6OS	-1.2	0.0222944
221514_at	UTP14A	-1.2	0.0291028
213326_at	VAMP1	-1.2	0.0469754
226732_at	RBM33	-1.2	0.0315014
1555760_a_at	RBM15	-1.2	0.0366464
202576_s_at	DDX19A /// DDX19B	-1.2	0.0359329
212322_at	SGPL1	-1.2	0.0222273
202657_s_at	SERTAD2	-1.2	0.0390622
218398_at	MRPS30	-1.2	0.0127902
201375_s_at	PPP2CB	-1.2	0.0283167
201207_at	TNFAIP1	-1.2	0.0373067
225230_at	TMEM77	-1.2	0.0383377
221536_s_at	LSG1	-1.2	0.0490339
218280_x_at	HIST2H2AA3 /// HIST2H2AA4	-1.2	0.0468425
225138_at	ZRANB1	-1.2	0.0223781
221808_at	RAB9A	-1.2	0.0295467
229520_s_at	C14orf118	-1.2	0.0441231
218852_at	PPP2R3C	-1.2	0.0352996
209221_s_at	OSBPL2	-1.2	0.0235658
202560_s_at	C1orf77	-1.2	0.0274199
224699_s_at	FAM62B	-1.2	0.00876773
202511_s_at	ATG5	-1.2	0.0256383
212168_at	RBM12	-1.2	0.0285973
204285_s_at	PMAIP1	-1.2	0.0232241
213342_at	YAP1	-1.2	0.0065252
225062_at	LOC100132181 /// LOC389831	-1.2	0.0218943
201410_at	PLEKHB2	-1.2	0.00496747
222409_at	CORO1C	-1.2	0.0114851
203745_at	HCCS	-1.2	0.0319485
200668_s_at	UBE2D3	-1.2	0.00721467
243_g_at	MAP4	-1.2	0.0178769
200829_x_at	ZNF207	-1.2	0.0438435
209510_at	RNF139	-1.2	0.0111877
224986_s_at	PDPK1	-1.2	0.0338908
202313_at	PPP2R2A	-1.2	0.0310587
238917_s_at	DENND5B	-1.2	0.021084
201684_s_at	TOX4	-1.2	0.0305695
231714_s_at	AP4B1	-1.2	0.0216434
211075_s_at	CD47	-1.2	0.0261735
204093_at	CCNH	-1.2	0.0435823
209340_at	UAP1	-1.2	0.0140546
226150_at	PPAPDC1B	-1.2	0.0249787
202297_s_at	RER1	-1.2	0.00854348
219397_at	COQ10B	-1.2	0.0274894
217892_s_at	LIMA1	-1.2	0.0190329
229630_s_at	WTAP	-1.2	0.0422518
219284_at	HSPBAP1	-1.2	0.0412087
218356_at	FTSJ2	-1.2	0.0398404
1555292_at	FAM40B	-1.2	0.0238066
229447_x_at	NBPF10 /// NBPF11 /// NBPF8 /// RP11-94I2.2	-1.2	0.0438698
218514_at	C17orf71	-1.2	0.0234189
221012_s_at	TRIM8	-1.2	0.0464514
223584_s_at	KBTBD2	-1.2	0.0313196
223062_s_at	PSAT1	-1.2	0.0328043
218005_at	ZNF22	-1.2	0.0252627
225281_at	C3orf17	-1.2	0.0386495
203897_at	LYRM1	-1.3	0.0161854
204382_at	NAT9	-1.3	0.0116156
225183_at	C16orf72	-1.3	0.0281288
208290_s_at	EIF5	-1.3	0.00244004
205690_s_at	BUD31	-1.3	0.0383377
203704_s_at	RREB1	-1.3	0.0331365
1553995_a_at	NT5E	-1.3	0.0219227
225106_s_at	OGFOD1	-1.3	0.0463037
225252_at	SRXN1	-1.3	0.0127472
205446_s_at	ATF2	-1.3	0.0217266
212666_at	SMURF1	-1.3	0.0190243
209398_at	HIST1H1C	-1.3	0.0354041
204423_at	MKLN1	-1.3	0.0150133
212010_s_at	CDV3	-1.3	0.0353372
224164_at	TPM3	-1.3	0.0324438
1558606_s_at		-1.3	0.0217066
205992_s_at	IL15	-1.3	0.00665034
209706_at	NKX3-1	-1.3	0.040704
212773_s_at	TOMM20	-1.3	0.0389263
221506_s_at	TNPO2	-1.3	0.0472641
231730_at	SEPSECS	-1.3	0.0375009
212434_at	GRPEL1	-1.3	0.0108502
209615_s_at	PAK1	-1.3	0.0495252
218582_at	2012-03-05	-1.3	0.0284225
213554_s_at	CDV3	-1.3	0.00502036
222802_at	EDN1	-1.3	0.0245114
209318_x_at	PLAGL1	-1.3	0.0386142
211678_s_at	RNF114	-1.3	0.0320144
206777_s_at	CRYBB2 /// CRYBB2P1	-1.3	0.0448919
201939_at	PLK2	-1.3	0.00996336
227093_at	USP36	-1.3	0.0426325
1553613_s_at	FOXC1	-1.3	0.0463622
211936_at	HSPA5	-1.3	0.0222944
201344_at	UBE2D2	-1.3	0.0193784
226996_at	LCLAT1	-1.3	0.00670165
214263_x_at	POLR2C	-1.3	0.0320144
223132_s_at	TRIM8	-1.3	0.0469413
202550_s_at	VAPB	-1.3	0.0243251
209386_at	TM4SF1	-1.3	0.0409389
225321_s_at	PILRB	-1.3	0.00431279
217938_s_at	KCMF1	-1.3	0.0218014
218071_s_at	MKRN2	-1.3	0.0423404
225172_at	CRAMP1L	-1.3	0.0273796
209744_x_at	ITCH	-1.3	0.0285747
203288_at	KIAA0355	-1.3	0.0157748
224469_s_at	INF2	-1.3	0.0376827
218761_at	RNF111	-1.3	0.0197512
228145_s_at	ZNF398	-1.3	0.0493044
219151_s_at	RABL2A /// RABL2B	-1.3	0.0361056
218134_s_at	RBM22	-1.3	0.0211581
208712_at	CCND1	-1.3	0.0291947
217858_s_at	ARMCX3	-1.3	0.0227928
238856_s_at	PANK2	-1.3	0.0266422
203985_at	ZNF212	-1.3	0.0222273
221580_s_at	TAF1D	-1.3	0.032051
225884_s_at	GZF1	-1.3	0.00726306
223729_at	CECR2	-1.3	0.0125241
203973_s_at	CEBPD	-1.3	0.0164684
1568678_s_at	FGFR1OP	-1.3	0.0165739
201244_s_at	RAF1	-1.3	0.0197512
235022_at	C18orf19	-1.3	0.01676
41512_at	BRAP	-1.3	0.0405975
212685_s_at	TBL2	-1.3	0.0252572
1553709_a_at	PRPF38A	-1.3	0.0276131
203622_s_at	PNO1	-1.3	0.010659
222763_s_at	WDR33	-1.3	0.0184231
223058_at	FAM107B	-1.3	0.00991074
213839_at	CLMN	-1.3	0.0275932
203455_s_at	SAT1	-1.3	0.0426064
225057_at	SLC15A4	-1.3	0.0410477
223430_at	SIK2	-1.3	0.0222944
208693_s_at	GARS	-1.3	0.0223781
214651_s_at	HOXA9	-1.3	0.00310194
221821_s_at	C12orf41	-1.3	0.0214833
218937_at	ZNF434	-1.3	0.0118846
209094_at	DDAH1	-1.3	0.0223464
1554271_a_at	CENPL	-1.3	0.0326782
203967_at	CDC6	-1.3	0.00838656
218867_s_at	C12orf49	-1.3	0.0346722
200815_s_at	PAFAH1B1	-1.3	0.00788265
204908_s_at	BCL3	-1.3	0.0291028
203944_x_at	BTN2A1	-1.3	0.049765
230859_at		-1.3	0.0344633
230350_at		-1.3	0.0277524
223209_s_at	SELS	-1.3	0.0222944
217924_at	C6orf106	-1.3	0.0223781
1553997_a_at	ASPHD1	-1.3	0.0469413
211977_at	GPR107	-1.3	0.039722
221676_s_at	CORO1C	-1.3	0.0313188
209198_s_at	SYT11	-1.3	0.0323241
226258_at	AMN1	-1.3	0.0383377
204568_at	KIAA0831	-1.3	0.0251126
219175_s_at	SLC41A3	-1.3	0.0469204
235384_at	NUDT19	-1.3	0.0303451
218648_at	CRTC3	-1.3	0.0487858
209311_at	BCL2L2	-1.3	0.0450814
206495_s_at	HINFP	-1.3	0.0300277
201229_s_at	ARIH2	-1.3	0.0342305
241433_at	RCOR3	-1.3	0.018743
204460_s_at	RAD1	-1.3	0.0445128
242984_at	MKLN1	-1.3	0.0371324
201142_at	EIF2S1	-1.3	0.0328043
224569_s_at	IRF2BP2	-1.3	0.0365159
219311_at	CEP76	-1.3	0.0287193
226117_at	TIFA	-1.3	0.0105626
208996_s_at	POLR2C	-1.3	0.0416975
225468_at	PATL1	-1.3	0.0325917
207654_x_at	DR1	-1.3	0.00485589
225813_at	RC3H2	-1.3	0.0389263
1568815_a_at	DDX50	-1.3	0.0462083
203120_at	TP53BP2	-1.3	0.0256659
222389_s_at	WAC	-1.3	0.0243712
201694_s_at	EGR1	-1.3	0.0439715
227828_s_at	FAM176A	-1.3	0.0395022
209694_at	PTS	-1.3	0.0268028
225783_at	UBE2F	-1.3	0.0185342
227846_at	GPR176	-1.3	0.0270751
201962_s_at	RNF41	-1.3	0.0409389
227591_at		-1.3	0.0496443
212561_at	DENND5A	-1.3	0.0200073
212923_s_at	C6orf145	-1.3	0.0355228
202010_s_at	ZNF410	-1.3	0.0144371
227718_at	PURB	-1.3	0.00706774
220011_at	C1orf135	-1.3	0.0160559
203707_at	ZNF263	-1.3	0.00706774
227745_at		-1.3	0.0323243
202636_at	RNF103	-1.3	0.0434816
229754_at		-1.3	0.0250714
219128_at	C2orf42	-1.3	0.0130571
220954_s_at	PILRB	-1.3	0.0463317
214473_x_at	PMS2L3	-1.3	0.00445478
229810_at		-1.3	0.0149133
1553322_s_at	TEAD1	-1.3	0.0424291
1555274_a_at	SELI	-1.3	0.016229
225212_at	SLC25A25	-1.3	0.0254395
203350_at	AP1G1	-1.3	0.00914004
1557905_s_at	CD44	-1.3	0.0022236
218940_at	C14orf138	-1.3	0.0331295
222703_s_at	YRDC	-1.3	0.0430467
201738_at	EIF1B	-1.3	0.0433002
204132_s_at	FOXO3 /// FOXO3B	-1.3	0.0222944
205621_at	ALKBH1	-1.3	0.0409047
210594_x_at	MPZL1	-1.3	0.0313196
219062_s_at	ZCCHC2	-1.3	0.0411147
222408_s_at	YPEL5	-1.3	0.0104041
209567_at	RRS1	-1.3	0.037902
204946_s_at	TOP3A	-1.3	0.0390622
231870_s_at	NMD3	-1.3	0.0450814
224571_at	IRF2BP2	-1.3	0.0210716
223267_at	RG9MTD1	-1.3	0.0406881
200867_at	RNF114	-1.3	0.00706774
220159_at	ABCA11P	-1.3	0.0353372
208091_s_at	ECOP	-1.3	0.0222944
209905_at	HOXA9	-1.3	0.0187204
214603_at	MAGEA2 /// MAGEA2B	-1.3	0.00695754
210592_s_at	SAT1	-1.3	0.00869789
219443_at	TASP1	-1.3	0.0416431
200953_s_at	CCND2	-1.3	0.0151804
203885_at	RAB21	-1.3	0.0454687
208078_s_at	SIK1	-1.3	0.0159938
228238_at	GAS5	-1.3	0.0435102
231863_at	ING3	-1.3	0.0475605
239277_at		-1.3	0.0440153
209384_at	PROSC	-1.3	0.00869789
225131_at	ZRANB1	-1.3	0.0112003
218615_s_at	TMEM39A	-1.3	0.0187058
226915_s_at	ARPC5L	-1.3	0.0105807
202272_s_at	FBXO28	-1.3	0.0468832
208705_s_at	EIF5	-1.3	0.0186961
221881_s_at	CLIC4	-1.3	0.0410477
208623_s_at	EZR	-1.3	0.0218943
224789_at	WDR40A	-1.3	0.0193853
231901_at	C19orf52	-1.3	0.00996336
201170_s_at	BHLHE40	-1.3	0.0296086
200670_at	XBP1	-1.3	0.0423618
1555281_x_at	ARMC8	-1.3	0.0384217
209180_at	RABGGTB	-1.3	0.006073
209188_x_at	DR1	-1.3	0.00905308
219711_at	ZNF586	-1.3	0.012553
227111_at	ZBTB34	-1.3	0.0368918
213671_s_at	MARS	-1.3	0.0262341
225848_at	ZNF746	-1.3	0.0339775
230588_s_at	LOC285074	-1.3	0.0194329
212749_s_at	RCHY1	-1.3	0.00244004
226876_at	FAM101B	-1.3	0.0313047
210216_x_at	RAD1	-1.3	0.0126632
225018_at	SPIRE1	-1.3	0.040461
221842_s_at	ZNF131	-1.3	0.0409389
219639_x_at	PARP6	-1.3	0.0161249
202647_s_at	NRAS	-1.3	0.00931159
210664_s_at	TFPI	-1.4	0.00911432
200020_at	TARDBP	-1.4	0.0193273
55081_at	MICALL1	-1.4	0.0274604
212840_at	UBXN7	-1.4	0.03688
239462_at	ZNF284	-1.4	0.0215199
228442_at		-1.4	0.0131226
208708_x_at	EIF5	-1.4	0.0127472
222524_s_at	ASB6	-1.4	0.0477134
218574_s_at	LMCD1	-1.4	0.0315014
222690_s_at	TMEM39A	-1.4	0.00622333
223076_s_at	NSUN2	-1.4	0.0378289
1553172_at	ZNF777	-1.4	0.0493407
218763_at	STX18	-1.4	0.0108634
226481_at	VPRBP	-1.4	0.0123994
214281_s_at	RCHY1	-1.4	0.00448033
203410_at	AP3M2	-1.4	0.0309924
204157_s_at	KIAA0999	-1.4	0.0499353
229181_s_at	HAUS2	-1.4	0.0322557
219983_at	HRASLS	-1.4	0.0411152
213161_at	C9orf97	-1.4	0.0166194
204970_s_at	MAFG	-1.4	0.023476
214686_at	ZNF266	-1.4	0.0426325
225296_at	ZNF317	-1.4	0.00848755
229231_at	LRRC37B	-1.4	0.0372074
35156_at	R3HCC1	-1.4	0.0495252
243661_at	ZNF273	-1.4	0.0493044
219596_at	THAP10	-1.4	0.0328043
221743_at	CUGBP1	-1.4	0.0166291
202686_s_at	AXL	-1.4	0.0318633
221497_x_at	EGLN1	-1.4	0.0127472
1553830_s_at	MAGEA2 /// MAGEA2B	-1.4	0.0108634
201772_at	AZIN1	-1.4	0.0231946
222804_x_at	WDR32	-1.4	0.00954804
218073_s_at	TMEM48	-1.4	0.0144371
235587_at	LOC202781	-1.4	0.0122749
231975_s_at	MIER3	-1.4	0.0489796
218524_at	E4F1	-1.4	0.0469961
208952_s_at	LARP5	-1.4	0.00536929
213311_s_at	TCF25	-1.4	0.0177765
218178_s_at	CHMP1B	-1.4	0.00331779
227359_at	C1orf102	-1.4	0.0286673
209944_at	ZNF410	-1.4	0.00869789
226566_at	TRIM11	-1.4	0.0441231
225831_at	LUZP1	-1.4	0.021838
224917_at	MIR21	-1.4	0.0117074
200798_x_at	MCL1	-1.4	0.0136844
211038_s_at	CROCCL1	-1.4	0.0127472
46270_at	UBAP1	-1.4	0.00152799
209254_at	KLHDC10	-1.4	0.0234642
201475_x_at	MARS	-1.4	0.0194329
227484_at	SRGAP1	-1.4	0.0455537
213916_at	ZNF20	-1.4	0.0359438
228482_at	CDRT4	-1.4	0.00460816
204520_x_at	BRD1	-1.4	0.00511106
209674_at	CRY1	-1.4	0.0323794
214892_x_at	C19orf29	-1.4	0.0102418
201558_at	RAE1	-1.4	0.00300232
224825_at	DNTTIP1	-1.4	0.0281288
226334_s_at	AHSA2	-1.4	0.0291028
238638_at	SLC37A2	-1.4	0.0477134
1320_at	PTPN21	-1.4	0.0486875
228135_at	C1orf52	-1.4	0.00420703
224951_at	LASS5	-1.4	0.0149133
226309_at	DNAL1	-1.4	0.0450814
236124_at	LOC153546	-1.4	0.0323414
220352_x_at	FLJ42627	-1.4	0.0477466
202771_at	FAM38A	-1.4	0.00996336
218193_s_at	GOLT1B	-1.4	0.0127472
242109_at	SYTL3	-1.4	0.0489796
226537_at	HINT3	-1.4	0.0368515
201984_s_at	EGFR	-1.4	0.0145331
207753_at	ZNF304	-1.4	0.0323241
229872_s_at	LOC100132999	-1.4	0.0296022
205497_at	ZNF175	-1.4	0.0379002
213848_at		-1.4	0.0293308
224326_s_at	PCGF6	-1.4	0.0438698
244856_at		-1.4	0.0210716
211452_x_at	LRRFIP1	-1.4	0.0345734
57516_at	ZNF764	-1.4	0.0438698
204313_s_at	CREB1	-1.4	0.0203332
228080_at	LAYN	-1.4	0.0406714
212200_at	ANKLE2	-1.4	0.0190346
204489_s_at	CD44	-1.4	0.00952893
213127_s_at	MED8	-1.4	0.0184231
1569366_a_at	ZNF569	-1.4	0.00827847
203439_s_at	STC2	-1.4	0.00726306
222133_s_at	PHF20L1	-1.4	0.0345691
215499_at	MAP2K3	-1.4	0.0223781
213134_x_at	BTG3	-1.4	0.00244004
218590_at	C10orf2	-1.4	0.015512
215385_at		-1.4	0.0300205
219178_at	QTRTD1	-1.4	0.0165544
54051_at	PKNOX1	-1.4	0.00490307
219522_at	FJX1	-1.4	0.0235621
223616_at	ZNF649	-1.4	0.0300205
228429_x_at	KIF9	-1.4	0.0286673
211280_s_at	NRF1	-1.4	0.0463534
226166_x_at	STK36	-1.4	0.0365159
214743_at	CUX1	-1.4	0.0433543
244734_at	MTHFSD	-1.4	0.0397377
226914_at	ARPC5L	-1.4	0.0202439
204298_s_at	LOX	-1.4	0.0291028
218401_s_at	ZNF281	-1.4	0.033411
203313_s_at	TGIF1	-1.4	0.0216244
236223_s_at	RIT1	-1.4	0.0326898
212590_at	RRAS2	-1.4	0.0273552
203600_s_at	C4orf8	-1.4	0.0148784
225118_at	SETD8	-1.4	0.01916
226581_at	ZFYVE20	-1.4	0.0212048
1569106_s_at	SETD5	-1.4	0.0411255
206703_at	CHRNB1	-1.4	0.0286531
229794_at	ZNF585A	-1.4	0.0342805
219557_s_at	NRIP3	-1.4	0.00854348
204094_s_at	TSC22D2	-1.4	0.0242934
1554602_at	RBM8A	-1.4	0.0418989
213407_at	PHLPPL	-1.4	0.0320144
204327_s_at	ZNF202	-1.4	0.0405098
203737_s_at	PPRC1	-1.4	0.0289471
212264_s_at	WAPAL	-1.4	0.0384817
225621_at	ALG2	-1.4	0.00996336
1553910_at	NBPF4	-1.4	0.0364176
221903_s_at	CYLD	-1.4	0.0139932
212232_at	FNBP4	-1.4	0.0321121
231319_x_at	KIF9	-1.4	0.0324353
239202_at		-1.4	0.0274604
227606_s_at	STAMBPL1	-1.4	0.0103425
219569_s_at	TMEM22	-1.4	0.0170549
241546_at	SPATA5	-1.4	0.035846
212238_at	ASXL1	-1.4	0.0344481
220966_x_at	ARPC5L	-1.4	0.0275478
233893_s_at	KIAA1530	-1.4	0.0491668
235207_at		-1.4	0.0287193
204866_at	PHF16	-1.4	0.0236771
210087_s_at	MPZL1	-1.4	0.0281288
241331_at	SKAP2	-1.4	0.0160914
202500_at	DNAJB2	-1.4	0.0180523
226384_at	PPAPDC1B	-1.4	0.025483
219492_at	CHIC2	-1.4	0.0133263
213139_at	SNAI2	-1.4	0.00958656
218545_at	CCDC91	-1.4	0.0447035
222794_x_at	MTPAP	-1.4	0.0231655
203091_at	FUBP1	-1.4	0.00274667
222497_x_at	NMD3	-1.4	0.0496973
200788_s_at	PEA15	-1.4	0.0129611
213696_s_at	MED8	-1.4	0.0151083
205251_at	PER2	-1.4	0.0118149
202910_s_at	CD97	-1.4	0.018291
218325_s_at	DIDO1	-1.4	0.0307109
221971_x_at	AGAP10 /// AGAP4 /// AGAP5 /// AGAP9 /// RP11-144G6.7	-1.4	0.0338228
203602_s_at	ZBTB17	-1.4	0.0263217
225520_at	MTHFD1L	-1.4	0.0024265
207563_s_at	OGT	-1.4	0.0155107
1555950_a_at	CD55	-1.4	0.0469204
32094_at	CHST3	-1.4	0.0119552
218474_s_at	KCTD5	-1.4	0.0116272
205214_at	STK17B	-1.4	0.0493044
234902_s_at	ZNF416	-1.4	0.0223781
202627_s_at	SERPINE1	-1.4	0.0160559
212241_at	GCOM1 /// GRINL1A	-1.4	0.0471476
213031_s_at	WDR73	-1.4	0.0151083
212971_at	CARS	-1.4	0.00496747
221064_s_at	UNKL	-1.4	0.0264877
219662_at	C2orf49	-1.4	0.0354041
220610_s_at	LRRFIP2	-1.4	0.00726306
203821_at	HBEGF	-1.4	0.0328043
243618_s_at	ZNF827	-1.4	0.000887
232065_x_at	CENPL	-1.4	0.0168492
218064_s_at	AKAP8L	-1.4	0.0199806
225594_at	CREBZF	-1.4	0.0468708
214007_s_at	TWF1	-1.4	0.0409425
209676_at	TFPI	-1.4	0.0498651
212818_s_at	ASB1	-1.4	0.00290357
224394_at	RNF7	-1.4	0.0256895
218468_s_at	GREM1	-1.4	0.0406881
218104_at	TEX10	-1.4	0.0156502
237438_at		-1.4	0.0379002
228138_at	ZNF498	-1.4	0.0383377
204470_at	CXCL1	-1.4	0.00345626
207000_s_at	PPP3CC	-1.4	0.0495252
235181_at	C2orf60	-1.4	0.0436823
218651_s_at	LARP6	-1.4	0.0124145
1564653_s_at	LEKR1	-1.4	0.0491624
213743_at	CCNT2	-1.4	0.0376499
244563_at	QSER1	-1.4	0.0446154
217371_s_at	IL15	-1.4	0.0126668
1565651_at	ARF1	-1.4	0.0285973
203598_s_at	WBP4	-1.4	0.041069
41329_at	SCYL3	-1.4	0.0362935
201926_s_at	CD55	-1.4	0.0410126
219641_at	DET1	-1.4	0.0492208
205256_at	ZBTB39	-1.4	0.0131226
32541_at	PPP3CC	-1.4	0.0213253
201195_s_at	SLC7A5	-1.4	0.0313196
203925_at	GCLM	-1.4	0.0286673
1563051_at	OSBP	-1.4	0.0191449
202406_s_at	TIAL1	-1.4	0.00876773
212295_s_at	SLC7A1	-1.4	0.010659
223569_at	PPAPDC1B	-1.4	0.0309321
216200_at	PLEKHM1	-1.4	0.00954804
204566_at	PPM1D	-1.4	0.0300205
219198_at	GTF3C4	-1.4	0.00367761
212722_s_at	JMJD6	-1.4	0.0190221
209479_at	CCDC28A	-1.4	0.0201209
201399_s_at	TRAM1	-1.4	0.0153067
221548_s_at	ILKAP	-1.4	0.0108634
228092_at	CREM	-1.4	0.0283167
243816_at	ZNF70	-1.4	0.0122907
209457_at	DUSP5	-1.5	0.00854348
213805_at	ABHD5	-1.5	0.0492159
1554501_at	TSC22D4	-1.5	0.0379403
227852_at	RP9	-1.5	0.00644299
223780_s_at	MED13	-1.5	0.0119273
36019_at	STK19	-1.5	0.00425787
231146_at	FAM24B	-1.5	0.0133864
215195_at	PRKCA	-1.5	0.0165739
235233_s_at	GMEB1	-1.5	0.00636382
228810_at	CCNYL1	-1.5	0.0137128
235648_at	ZNF567	-1.5	0.0456608
204155_s_at	KIAA0999	-1.5	0.00952893
218279_s_at	HIST2H2AA3	-1.5	0.047154
221211_s_at	C21orf7	-1.5	0.0222612
223124_s_at	C1orf128	-1.5	0.0355228
210679_x_at		-1.5	0.0130571
235295_at		-1.5	0.0342805
226513_at	ASB7	-1.5	0.0387409
218214_at	C12orf44	-1.5	0.00479661
227670_at	ZNF75A	-1.5	0.0433004
218683_at	PTBP2	-1.5	0.0279858
238825_at	ACRC	-1.5	0.0262199
212501_at	CEBPB	-1.5	0.00640361
228234_at	TICAM2	-1.5	0.0192857
227607_at	STAMBPL1	-1.5	0.00244004
222130_s_at	FTSJ2	-1.5	0.039722
202794_at	INPP1	-1.5	0.011443
204490_s_at	CD44	-1.5	0.0343451
226797_at	MBTD1	-1.5	0.0320144
232097_at	TOX4	-1.5	0.0432491
227375_at	ANKRD13C	-1.5	0.0440153
218023_s_at	FAM53C	-1.5	0.0222944
212110_at	SLC39A14	-1.5	0.000743
206018_at	FOXG1	-1.5	0.0424037
1554217_a_at	CCDC132	-1.5	0.0365354
223297_at	AMMECR1L	-1.5	0.00244004
226759_at	IKZF4	-1.5	0.0274604
1555971_s_at	FBXO28	-1.5	0.0285747
234584_s_at	ATE1	-1.5	0.0119081
221734_at	PRRC1	-1.5	0.0326782
224960_at	SCYL2	-1.5	0.0344633
226881_at	GRPEL2	-1.5	0.0300506
226750_at	LARP2	-1.5	0.0114686
209946_at	VEGFC	-1.5	0.00312245
225213_at	PPTC7	-1.5	0.0400024
226862_at	MBD1	-1.5	0.0432491
201369_s_at	ZFP36L2	-1.5	0.0220007
222605_at	RCOR3	-1.5	0.0282355
226582_at	LOC400043	-1.5	0.0424037
228033_at	E2F7	-1.5	0.0194329
217836_s_at	YY1AP1	-1.5	0.00958656
204088_at	P2RX4	-1.5	0.0214862
229146_at	C7orf31	-1.5	0.0234544
1552489_s_at	MPP4	-1.5	0.0202684
235092_at		-1.5	0.0426982
227133_at	CXorf39	-1.5	0.0038345
204930_s_at	BNIP1	-1.5	0.00420703
218020_s_at	ZFAND3	-1.5	0.0127472
225832_s_at	DAGLB	-1.5	0.0118846
225464_at	FRMD6	-1.5	0.0159369
221245_s_at	FZD5	-1.5	0.0441231
220990_s_at	MIR21 /// TMEM49	-1.5	0.0108527
212892_at	ZNF282	-1.5	0.0154009
235463_s_at	LASS6	-1.5	0.0127472
223853_at	BVES	-1.5	0.0492208
201502_s_at	NFKBIA	-1.5	0.0357429
202130_at	RIOK3	-1.5	0.0207468
34225_at	WHSC2	-1.5	0.00791012
235556_at		-1.5	0.0291075
225951_s_at	CHD2	-1.5	0.0292322
227129_x_at	tcag7.907	-1.5	0.0468832
218655_s_at	CCDC49	-1.5	0.0368515
223602_at	USP30	-1.5	0.0431657
225642_at	KTI12	-1.5	0.00869789
212373_at	FEM1B	-1.5	0.00859629
221841_s_at	KLF4	-1.5	0.00216161
221927_s_at	ABHD11	-1.5	0.00427472
223427_s_at	EPB41L4B	-1.5	0.00367761
242366_at		-1.5	0.0250714
219673_at	MCM9	-1.5	0.00541429
207829_s_at	BNIP1	-1.5	0.0276238
221865_at	C9orf91	-1.5	0.00593316
224810_s_at	ANKRD13A	-1.5	0.00431279
225203_at	PPP1R16A	-1.5	0.0495797
225278_at	PRKAB2	-1.5	0.0476808
213065_at	ZFC3H1	-1.5	0.0371324
209835_x_at	CD44	-1.5	0.0163423
236574_at	LOC284373	-1.5	0.00952893
213310_at	EIF2C2	-1.5	0.0127902
1557055_s_at	LOC643837	-1.5	0.0168492
201153_s_at	MBNL1	-1.5	0.0337694
210665_at	TFPI	-1.5	0.0146003
232035_at	HIST1H4B	-1.5	0.0352737
217939_s_at	AFTPH	-1.5	0.0359329
219066_at	PPCDC	-1.5	0.0386142
205548_s_at	BTG3	-1.5	0.0137668
218738_s_at	RNF138	-1.5	0.0241102
211414_at	GLS	-1.5	0.00310194
203578_s_at	SLC7A6	-1.5	0.0212192
224839_s_at	GPT2	-1.5	0.00445478
219691_at	SAMD9	-1.5	0.0444891
211297_s_at	CDK7	-1.5	0.00579779
236656_s_at	LOC100130506	-1.5	0.00502036
219224_x_at	ZNF408	-1.5	0.0197067
235296_at	EIF5A2	-1.5	0.040461
210312_s_at	IFT20	-1.5	0.000412
203051_at	BAHD1	-1.5	0.0126467
226135_at	UHRF1BP1	-1.5	0.00330998
231973_s_at	ANAPC1	-1.5	0.00322353
208622_s_at	EZR	-1.5	0.0437241
207777_s_at	SP140	-1.5	0.0473775
226342_at	SPTBN1	-1.5	0.0200716
1553672_at	ENAH	-1.5	0.0364176
222537_s_at	CDC42SE1	-1.5	0.0130571
227963_at		-1.5	0.0146181
235826_at		-1.5	0.0034524
206175_x_at	ZNF222	-1.5	0.00587855
226327_at	ZNF507	-1.5	0.0405936
44146_at	GMEB2	-1.5	0.0119796
225443_at	DCP1A	-1.5	0.00349277
202197_at	MTMR3	-1.5	0.0263483
223450_s_at	COG3	-1.5	0.0314419
223546_x_at	LUC7L	-1.5	0.0496973
202514_at	DLG1	-1.5	0.0423913
1558762_a_at	ZNF789	-1.5	0.0127472
1557051_s_at		-1.5	0.0260041
1552897_a_at	KCNG3	-1.5	0.0463622
228742_at		-1.5	0.0469413
204897_at	PTGER4	-1.5	0.0283167
1553099_at	TIGD1	-1.5	0.0120106
226752_at	FAM174A	-1.5	0.0389905
31845_at	ELF4	-1.5	0.0342805
222669_s_at	SBDS /// SBDSP	-1.5	0.00502036
212201_at	ANKLE2	-1.5	0.0133763
244664_at		-1.5	0.0303451
226650_at	ZFAND2A	-1.5	0.00753874
205452_at	PIGB	-1.5	0.0348395
226887_at	HSPA14	-1.5	0.00258776
227013_at	LATS2	-1.5	0.0281288
204937_s_at	ZNF274	-1.5	0.0119273
226307_at	CRTC2	-1.5	0.0385306
202140_s_at	CLK3	-1.5	0.0222944
218368_s_at	TNFRSF12A	-1.5	0.0119273
203499_at	EPHA2	-1.5	0.0270374
203324_s_at	CAV2	-1.5	0.00367761
225945_at	ZNF655	-1.5	0.0482173
1555004_a_at	RBL1	-1.5	0.0243251
206238_s_at	YAF2	-1.5	0.00367761
1557415_s_at	LETM2	-1.5	0.00519557
214323_s_at	UPF3A	-1.5	0.0186533
230574_at	LOC100130938	-1.5	0.0313196
227696_at	EXOSC6	-1.5	0.0240618
201761_at	MTHFD2	-1.5	0.00544586
225819_at	TBRG1	-1.5	0.0197512
235536_at	SNORD89	-1.5	0.0452051
224610_at	SNHG1	-1.5	0.0015065
205263_at	BCL10	-1.5	0.0274604
243463_s_at	RIT1	-1.5	0.0314419
207391_s_at	PIP5K1A	-1.5	0.0130571
203250_at	RBM16	-1.5	0.00996336
202631_s_at	APPBP2	-1.5	0.0147109
204666_s_at	RP5-1000E10.4	-1.5	0.00288612
228098_s_at	MYLIP	-1.5	0.0147536
227640_s_at	RP9 /// RP9P	-1.5	0.0130571
218954_s_at	BRF2	-1.5	0.01479
227443_at	C9orf150	-1.5	0.0046426
205205_at	RELB	-1.5	0.0300472
201401_s_at	ADRBK1	-1.5	0.0292876
209062_x_at	NCOA3	-1.5	0.0164195
203372_s_at	SOCS2	-1.5	0.00367761
225963_at	KLHDC5	-1.5	0.0114077
242255_at	LOC100130837	-1.5	0.0228517
236640_at	LOC399959	-1.5	0.0398404
213304_at	FAM179B	-1.5	0.0435649
210162_s_at	NFATC1	-1.5	0.00296204
221208_s_at	C11orf61	-1.5	0.0313047
213349_at	TMCC1	-1.5	0.00831364
209403_at	LOC653498 /// TBC1D3 /// TBC1D3C /// TBC1D3D /// TBC1D3E /// TBC1D3F /// TBC1D3H	-1.5	0.00854348
201368_at	ZFP36L2	-1.5	0.0108634
213051_at	ZC3HAV1	-1.5	0.0300205
219875_s_at	PPPDE1	-1.5	0.0434829
225612_s_at	B3GNT5	-1.5	0.0450814
225527_at	CEBPG	-1.5	0.032393
228314_at	LRRC8C	-1.6	0.0222273
224206_x_at	MYNN	-1.6	0.0116272
226208_at	ZSWIM6	-1.6	0.0118846
227449_at	EPHA4	-1.6	0.0398404
207247_s_at	ZFX /// ZFY	-1.6	0.00375877
1555772_a_at	CDC25A	-1.6	0.0365159
213951_s_at	PSMC3IP	-1.6	0.0225622
212842_x_at	RGPD4 /// RGPD5 /// RGPD6 /// RGPD8	-1.6	0.0354041
1552303_a_at	TMEM106A	-1.6	0.0202327
239451_at		-1.6	0.0359899
202843_at	DNAJB9	-1.6	0.0468225
1570394_at	XRN1	-1.6	0.0438698
213558_at	PCLO	-1.6	0.0113022
217168_s_at	HERPUD1	-1.6	0.0102178
235521_at	HOXA3	-1.6	0.0127902
235983_at		-1.6	0.0367946
203127_s_at	SPTLC2	-1.6	0.0122907
205995_x_at	IQCB1	-1.6	0.0128779
212723_at	JMJD6	-1.6	0.0124145
203234_at	UPP1	-1.6	0.0267414
1557353_at		-1.6	0.0275478
219026_s_at	RASAL2	-1.6	0.0353372
212614_at	ARID5B	-1.6	0.0286673
225521_at	ANAPC7	-1.6	0.00838212
203011_at	IMPA1	-1.6	0.0286673
232467_at	KIRREL	-1.6	0.0391679
205981_s_at	ING2	-1.6	0.00854348
224657_at	ERRFI1	-1.6	0.00375373
230205_at	ZNF561	-1.6	0.0410477
200924_s_at	SLC3A2	-1.6	0.00630833
218721_s_at	C1orf27	-1.6	0.0254395
226413_at	LOC400027	-1.6	0.0183087
213218_at	ZNF187	-1.6	0.0127472
209295_at	TNFRSF10B	-1.6	0.0468425
210512_s_at	VEGFA	-1.6	0.01479
214714_at	ZNF394	-1.6	0.0136844
207148_x_at	MYOZ2	-1.6	0.0380169
1569974_x_at	2012-09-13	-1.6	0.00180222
233770_at		-1.6	0.0481349
214474_at	PRKAB2	-1.6	0.0127902
223945_x_at	RP9P	-1.6	0.00328285
1557347_at	MCPH1	-1.6	0.0161854
235709_at	GAS2L3	-1.6	0.0416975
203830_at	C17orf75	-1.6	0.0305106
214541_s_at	QKI	-1.6	0.048062
226866_at	ESCO1	-1.6	0.0285747
1555977_at		-1.6	0.0487858
214469_at	HIST1H2AE	-1.6	0.0133263
213934_s_at	ZNF23	-1.6	0.00958656
223974_at	MGC11082	-1.6	0.0145668
212662_at	PVR	-1.6	0.0286673
1561017_at		-1.6	0.025483
217997_at	PHLDA1	-1.6	0.0154009
203730_s_at	ZKSCAN5	-1.6	0.0122061
202543_s_at	GMFB	-1.6	0.00911432
222732_at	TRIM39	-1.6	0.0483743
208961_s_at	KLF6	-1.6	0.0100229
1555832_s_at	KLF6	-1.6	0.0144523
232172_at	LOC401577	-1.6	0.0118037
219629_at	FAM118A	-1.6	0.0210521
238542_at	ULBP2	-1.6	0.0101615
217911_s_at	BAG3	-1.6	0.0125873
218478_s_at	ZCCHC8	-1.6	0.0283167
202171_at	VEZF1	-1.6	0.0411147
38037_at	HBEGF	-1.6	0.0159569
239193_at	FUBP3	-1.6	0.0247307
1554015_a_at	CHD2	-1.6	0.0410477
227638_at	KIAA1632	-1.6	0.00989802
221638_s_at	STX16	-1.6	0.0492208
204421_s_at	FGF2	-1.6	0.0435639
204605_at	CGRRF1	-1.6	0.00310194
234738_s_at	LOC100129637	-1.6	0.0040361
215253_s_at	RCAN1	-1.6	0.0268988
228181_at	SLC30A1	-1.6	0.0302992
235315_at	TSC22D1	-1.6	0.0420718
203574_at	NFIL3	-1.6	0.00244004
205873_at	PIGL	-1.6	0.039722
227650_at	HSPA14	-1.6	0.00367761
227621_at		-1.6	0.0186533
219248_at	THUMPD2	-1.6	0.0156502
211707_s_at	IQCB1	-1.6	0.0288414
231269_at	ASCC3	-1.6	0.0256881
203373_at	SOCS2	-1.6	0.0117074
213239_at	PIBF1	-1.6	0.0421743
209578_s_at	POFUT2	-1.6	0.0118037
226038_at	LONRF1	-1.6	0.0303107
230440_at	ZNF469	-1.6	0.0222273
242476_at		-1.6	0.0409389
238691_at	SNHG10	-1.6	0.0405936
235230_at	PLCXD2	-1.6	0.0398709
226267_at	JDP2	-1.6	0.0305106
222632_s_at	LZTFL1	-1.6	0.0382408
219292_at	THAP1	-1.6	0.0160559
1554348_s_at	CDKN2AIPNL	-1.6	0.00905308
228305_at	ZNF565	-1.6	0.00310542
226370_at	KLHL15	-1.6	0.0490339
212810_s_at	SLC1A4	-1.6	0.0129932
1552928_s_at	MAP3K7IP3	-1.6	0.0429479
57703_at	SENP5	-1.6	0.000743
228642_at		-1.6	0.0194329
208685_x_at	BRD2	-1.6	0.0225622
203624_at	SFRS17A	-1.6	0.0163526
212171_x_at	VEGFA	-1.6	0.0252627
203743_s_at	TDG	-1.6	0.0116156
216902_s_at	LOC653390 /// LOC730092 /// RRN3	-1.6	0.01479
226893_at	ABL2	-1.6	0.0328043
209193_at	PIM1	-1.6	0.0477134
218364_at	LRRFIP2	-1.6	0.0202327
223687_s_at	LY6K	-1.6	0.00288612
218861_at	RNF25	-1.6	0.0302477
1554915_a_at	PDE12	-1.6	0.0355228
1556645_s_at		-1.6	0.039476
223380_s_at	LATS2	-1.6	0.0191236
227035_x_at	RP9P	-1.6	0.00265681
209304_x_at	GADD45B	-1.6	0.0194329
225623_at	KIAA1737	-1.6	0.0254395
65588_at	LOC388796	-1.6	0.0156055
204645_at	CCNT2	-1.6	0.0495797
226555_at	INO80D	-1.6	0.0133864
208994_s_at	PPIG	-1.6	0.0450778
230380_at	THAP2	-1.6	0.0130571
220086_at	IKZF5	-1.6	0.0223781
236117_at		-1.6	0.0144371
221563_at	DUSP10	-1.6	0.0401353
212902_at	SEC24A	-1.6	0.0267034
226608_at	C16orf87	-1.6	0.0470128
213370_s_at	SFMBT1	-1.7	0.0127472
216908_x_at	LOC730092	-1.7	0.0107607
215779_s_at	HIST1H2BG	-1.7	0.00427472
203301_s_at	DMTF1	-1.7	0.0218014
242160_at		-1.7	0.0404199
1554053_at	SPTLC1	-1.7	0.00876773
239678_at		-1.7	0.00660391
214169_at	UNC84A	-1.7	0.0225622
205807_s_at	TUFT1	-1.7	0.0159569
229050_s_at	SNHG7	-1.7	0.0127472
229344_x_at	RIMKLB	-1.7	0.0238066
235589_s_at		-1.7	0.0211581
203927_at	NFKBIE	-1.7	0.0468098
232730_at	C19orf44	-1.7	0.0238537
213097_s_at	DNAJC2	-1.7	0.0256789
206096_at	ZNF35	-1.7	0.0331365
226284_at	ZBTB2	-1.7	0.0181128
239669_at		-1.7	0.0214833
228316_at	C2orf63	-1.7	0.0233209
218871_x_at	CSGALNACT2	-1.7	0.0344442
238756_at	GAS2L3	-1.7	0.0469413
227755_at		-1.7	0.0191236
225075_at	PDRG1	-1.7	0.00356711
231850_x_at	KIAA1712	-1.7	0.021084
1552711_a_at	CYB5D1	-1.7	0.0391679
223773_s_at	SNHG12	-1.7	0.00244004
229123_at		-1.7	0.0402173
225146_at	C9orf25	-1.7	0.0223781
203898_at	CRCP	-1.7	0.02511
227697_at	SOCS3	-1.7	0.0207443
206411_s_at	ABL2	-1.7	0.00781465
1555420_a_at	KLF7	-1.7	0.00194244
206173_x_at	GABPB1	-1.7	0.0187335
205266_at	LIF	-1.7	0.0024265
212209_at	MED13L	-1.7	0.0469961
210117_at	SPAG1	-1.7	0.0430467
205130_at	RAGE	-1.7	0.00914004
235258_at	DCP2	-1.7	0.0133883
228702_at	FLJ43663	-1.7	0.00290357
232311_at	B2M	-1.7	0.0456608
213497_at	ABTB2	-1.7	0.0291028
1554155_at	MCPH1	-1.7	0.0203596
232030_at	KIAA1632	-1.7	0.018649
1560814_a_at	C15orf57	-1.7	0.0256568
1554661_s_at	C1orf71	-1.7	0.0353372
203002_at	AMOTL2	-1.7	0.0133536
213216_at	OTUD3	-1.7	0.0296342
216248_s_at	NR4A2	-1.7	0.0402216
225634_at	ZC3HAV1	-1.7	0.0144523
219266_at	ZNF350	-1.7	0.0133883
213804_at	INPP5B	-1.7	0.0225622
208082_x_at	MKRN1	-1.7	0.0127472
227207_x_at	ZNF213	-1.7	0.044957
243982_at	KLHL28	-1.7	0.00996336
1568765_at	SERPINE1	-1.7	0.0022236
230542_at	ZNF597	-1.7	0.0256789
218647_s_at	YRDC	-1.7	0.0305695
227270_at	LOC285550	-1.7	0.0222944
219398_at	CIDEC	-1.7	0.0270335
212589_at	RRAS2	-1.7	0.00630833
231065_at	PDE6D	-1.7	0.00409218
202628_s_at	SERPINE1	-1.7	0.00270862
201057_s_at	GOLGB1	-1.7	0.0102458
229541_at		-1.7	0.0359329
1553224_at	LUZP1	-1.7	0.0342805
239134_at		-1.7	0.0480691
218344_s_at	RCOR3	-1.7	0.0428808
210513_s_at	VEGFA	-1.7	0.0277756
224149_x_at	SLMAP	-1.7	0.0148312
222243_s_at	TOB2	-1.7	0.0127329
229576_s_at	TBX3	-1.7	0.0375009
235456_at		-1.7	0.0186533
219270_at	CHAC1	-1.7	0.0301895
229428_at	LOC100132418	-1.7	0.00227907
207574_s_at	GADD45B	-1.7	0.00448033
201329_s_at	ETS2	-1.7	0.013874
221206_at	PMS2 /// PMS2CL	-1.7	0.0250714
226337_at	GORAB	-1.7	0.00448033
239431_at	TICAM2	-1.7	0.0379002
228346_at	ZNF844	-1.7	0.00854348
222235_s_at	CSGALNACT2	-1.7	0.0322442
215404_x_at	FGFR1	-1.7	0.0314302
208361_s_at	POLR3D	-1.7	0.00445478
229801_at	C10orf47	-1.7	0.0288097
230450_at		-1.7	0.0456608
204507_s_at	PPP3R1	-1.7	0.0191449
201925_s_at	CD55	-1.7	0.0129932
213844_at	HOXA5	-1.7	0.0155318
204472_at	GEM	-1.7	0.00310194
226188_at	HSPC159	-1.7	0.0293006
1552302_at	TMEM106A	-1.7	0.0469413
203899_s_at	CRCP	-1.7	0.0354041
1554453_at	HNRPLL	-1.7	0.0390622
232676_x_at	MYEF2	-1.7	0.0476808
201465_s_at	JUN	-1.7	0.0154769
220987_s_at	C11orf17 /// NUAK2	-1.8	0.0355228
244433_at		-1.8	0.0355228
230665_at		-1.8	0.0325061
215948_x_at	ZMYM5	-1.8	0.0222944
226588_at	CWC22	-1.8	0.0461678
230123_at	NECAP2	-1.8	0.00976573
224808_s_at	C7orf20	-1.8	0.0376253
210405_x_at	TNFRSF10B	-1.8	0.0265792
225857_s_at	LOC388796	-1.8	0.00640361
201289_at	CYR61	-1.8	0.0151584
212195_at	IL6ST	-1.8	0.0285956
218757_s_at	UPF3B	-1.8	0.0214605
219548_at	ZNF16	-1.8	0.0495252
1557290_at	DPY19L2 /// DPY19L2P1 /// DPY19L2P2 /// DPY19L2P4	-1.8	0.0418458
212724_at	RND3	-1.8	0.00347551
1552644_a_at	PHC3	-1.8	0.0448585
206034_at	SERPINB8	-1.8	0.0207468
229069_at	SARNP	-1.8	0.0118037
1555370_a_at	CAMTA1	-1.8	0.0286673
221667_s_at	HSPB8	-1.8	0.00409218
1558290_a_at	PVT1	-1.8	0.0125241
231822_at	CTTNBP2NL	-1.8	0.0376253
238682_at	CCDC96	-1.8	0.0473297
210718_s_at	ARL17P1	-1.8	0.00825953
207535_s_at	NFKB2	-1.8	0.045273
1559964_at	FLJ38717	-1.8	0.0277756
1560208_at		-1.8	0.0122061
204621_s_at	NR4A2	-1.8	0.0151083
232184_at	ALS2	-1.8	0.0211581
222270_at	SMEK2	-1.8	0.0448585
227099_s_at	LOC387763	-1.8	0.0282355
228128_x_at	PAPPA	-1.8	0.0259788
205207_at	IL6	-1.8	0.0354041
210762_s_at	DLC1	-1.8	0.0179706
1559249_at	ATXN1	-1.8	0.00665034
1554346_at	GNB5	-1.8	0.0307835
1558305_at	GIGYF2	-1.8	0.00587855
233057_at	HSPB8	-1.8	0.0133263
215071_s_at	HIST1H2AC	-1.8	0.00525757
229488_at	OTUD7B	-1.8	0.0234857
225590_at	SH3RF1	-1.8	0.0227964
205281_s_at	PIGA	-1.8	0.0172383
218371_s_at	PSPC1	-1.8	0.00310194
220370_s_at	USP36	-1.8	0.0306144
236937_at	VPS8	-1.8	0.0222944
209020_at	C20orf111	-1.8	0.00244004
202301_s_at	RSRC2	-1.8	0.0298494
213124_at	ZNF473	-1.8	0.00244004
204529_s_at	TOX	-1.8	0.0197512
240190_at		-1.8	0.0450814
218972_at	TTC17	-1.8	0.00585114
204420_at	FOSL1	-1.8	0.0326236
1556006_s_at	CSNK1A1	-1.8	0.0218943
227542_at	SOCS6	-1.8	0.0369478
235414_at	ZNF383	-1.8	0.0223781
203725_at	GADD45A	-1.8	0.000944
238711_s_at	ZNF148	-1.8	0.0341219
41387_r_at	KDM6B	-1.8	0.0341492
213387_at	ATAD2B	-1.8	0.0390622
236473_at	CC2D2A	-1.8	0.047735
203322_at	ADNP2	-1.8	0.0130571
1558969_a_at	RPL32P3	-1.8	0.0354041
222872_x_at	OBFC2A	-1.8	0.0456608
204948_s_at	FST	-1.8	0.0320144
224832_at	DUSP16	-1.8	0.025483
219996_at	ASB7	-1.8	0.00244526
212811_x_at	SLC1A4	-1.8	0.0329833
206507_at	ZSCAN12	-1.8	0.00593316
215078_at	SOD2	-1.8	0.00859629
201009_s_at	TXNIP	-1.8	0.00784509
225699_at	C7orf40	-1.8	0.00274667
213118_at	UHRF1BP1L	-1.8	0.0187641
243815_at	PGBD4	-1.8	0.0386495
202302_s_at	RSRC2	-1.8	0.0130571
227492_at		-1.8	0.0343467
220266_s_at	KLF4	-1.8	0.0178769
219627_at	ZNF767	-1.8	0.00367761
226015_at	ZNF12	-1.8	0.0377644
1555441_at	UBA6	-1.8	0.0144371
237945_at		-1.8	0.0493627
219848_s_at	ZNF432	-1.8	0.015967
241722_x_at		-1.8	0.00905308
202220_at	KIAA0907	-1.8	0.00245696
239331_at		-1.8	0.0442524
210650_s_at	PCLO	-1.8	0.00517485
205047_s_at	ASNS	-1.8	0.00244526
226847_at	FST	-1.8	0.012553
219801_at	ZNF34	-1.8	0.0250634
238824_at		-1.8	0.0359899
228785_at	ZNF281	-1.8	0.0239611
227309_at	YOD1	-1.8	0.0212381
233085_s_at	OBFC2A	-1.9	0.0103588
223302_s_at	ZNF655	-1.9	0.00319278
1552562_at	ZNF570	-1.9	0.0222944
220520_s_at	NUP62CL	-1.9	0.0410126
218469_at	GREM1	-1.9	0.0160559
209545_s_at	RIPK2	-1.9	0.000743
225539_at	ZNF295	-1.9	0.0392283
212845_at	SAMD4A	-1.9	0.00296204
236706_at	LYG1	-1.9	0.00996336
224606_at	KLF6	-1.9	0.0309439
231936_at	HOXC9	-1.9	0.00530632
205443_at	SNAPC1	-1.9	0.0207468
242639_at	NARG2	-1.9	0.0291028
226952_at	EAF1	-1.9	0.00245696
[truncated: 269 more rows]
