# Supplementary material for: DUX4 Differentially Regulates Transcriptomes of Human Rhabdomyosarcoma and Mouse C2C12 Cells
Source: PLoS One. 2013 May 22;8(5):e64691. doi: 10.1371/journal.pone.0064691 (PMC3661531; doi:10.1371/journal.pone.0064691)
Supplement: Table S2 — Transcripts regulated by DUX4 in C2C12 cells. C2C12 cells transfected with DUX4 expression vector and insertless vector (control) were expression profiled and fold-changes of transcripts changed in response to ectopic DUX4 expression were calculated relative to control. Welch's t test was performed to calculate the probabilities of significant gene expression changes (p<0.05) along with multiple testing correction using Benjamini Hochberg False Discovery Rate (5%). (XLSX) [file pone.0064691.s002.xlsx]

## Sheet: Sheet1
Table S2: Transcripts regulated by DUX4 in C2C12 cells
Probe Set ID	Gene Symbol	Fold Change	Corrected p-value
1421799_at	Uts2	224.4	0.00343238
1431970_at	Tm7sf4	98.5	0.00603744
1442334_at	OTTMUSG00000010130 /// OTTMUSG00000010136 /// OTTMUSG00000010207	70	0.0125067
1460012_at	Wfdc3	14.7	0.0301193
1429099_at	Duxbl	11	0.0198935
1445710_x_at	Duxbl	9.8	0.02035
1457033_at	BQ559217 /// Zscan4-ps2 /// Zscan4-ps3 /// Zscan4c /// Zscan4f	7.4	0.0290918
1424596_s_at	Lmcd1	6.4	0.016327
1420773_at	Dub1	5.1	0.0411318
1418472_at	Aspa	4.1	0.00397531
1431148_at		3.9	0.0472171
1423450_a_at	Hs3st1	3.6	0.0292988
1450767_at	Nedd9	3.1	0.0286867
1436538_at	Ankrd37	2.8	0.0395227
1454959_s_at	Gnai1	2.5	0.00603744
1448598_at	Mmp17	2.4	0.0411318
1427164_at	Il13ra1	2.3	0.0292988
1421425_a_at	Rcan2	2.3	0.00875965
1450966_at	Crot	2.2	0.0254275
1425475_at	Col4a5	2.2	0.0424322
1426562_a_at	Olfm1	2.1	0.0487711
1448275_at	Tmem19	2.1	0.016327
1425784_a_at	Olfm1	2.1	0.0405066
1426640_s_at	Trib2	2.1	0.0491365
1422818_at	Nedd9	2	0.0472171
1456307_s_at	Adcy7	2	0.0154609
1428250_at	Gper	1.9	0.016327
1424409_at	Cldn23	1.9	0.0444631
1444302_at	Glt8d4 /// LOC100048436	1.9	0.0378788
1433820_a_at	1110012D08Rik	1.9	0.016327
1453313_at	Sesn3	1.8	0.0360776
1433544_at	Stradb	1.8	0.0257609
1420981_a_at	Lmo4	1.8	0.016327
1418300_a_at	Mknk2	1.7	0.0247114
1426584_a_at	Sord	1.7	0.0461642
1416868_at	Cdkn2c	1.7	0.0487711
1415943_at	Sdc1	1.7	0.0483422
1419276_at	Enpp1	1.7	0.0463953
1426376_at	Reep5	1.7	0.0254275
1450106_a_at	Evl /// LOC100047333	1.7	0.0491365
1459546_s_at	Enpp1	1.6	0.0461642
1434436_at	Morc4	1.6	0.02372
1428547_at	Nt5e	1.6	0.0453354
1426934_at	Nhsl1	1.6	0.0461642
1416261_at	Tmem19	1.6	0.0301193
1416488_at	Ccng2	1.6	0.0424322
1423831_at	Prkag2	1.6	0.0401603
1416252_at	Stk38	1.6	0.00214988
1422440_at	Cdk4 /// LOC640611	1.6	0.0166964
1417164_at	Dusp10	1.6	0.0317569
1415995_at	Casp6	1.5	0.0211473
1456387_at	Nol4	1.5	0.0483422
1456377_x_at	Limd2	1.5	0.0491365
1425107_a_at	Lifr	1.5	0.0411318
1419509_a_at	Nagk	1.5	0.0461642
1450112_a_at	Gas2	1.5	0.0257609
1435323_a_at	Mboat1	1.5	0.0354576
1423808_at	Wrap53	1.5	0.0434818
1424906_at	Pqlc3	1.5	0.041819
1438001_x_at	Reep5	1.5	0.0248556
1418778_at	Ccdc109b	1.4	0.0153768
1450660_at	Pts	1.4	0.016327
1434789_at	Depdc1b	1.4	0.0424322
1423280_at	Stmn2	1.4	0.00397531
1424410_at	Ttc8	1.4	0.0254275
1426983_at	Fnbp1	1.4	0.00603744
1434486_x_at	Ugp2	1.4	0.0461642
1460037_at	Fam98b	1.4	0.0259581
1429364_at	4930579G24Rik	1.4	0.0254275
1424760_a_at	Smyd2	1.4	0.0328934
1423856_at	Popdc3	1.4	0.0154609
1419153_at	2810417H13Rik	1.4	0.0429676
1417474_at	1500035H01Rik	1.3	0.0429676
1417690_at	Prkag1	1.3	0.0211473
1452365_at	Csgalnact1	1.3	0.0378788
1426344_at	Gle1	1.3	0.0302414
1423394_at	Pcyox1	1.3	0.0461642
1416092_a_at	Mtap4	1.3	0.0254275
1418067_at	Cfl2	1.3	0.00838198
1417663_a_at	Ndrg3	1.3	0.0337619
1429278_at	Nubpl	1.3	0.016327
1423687_a_at	Man2c1	1.3	0.0225356
1415840_at	Elovl5	1.3	0.0461642
1417743_at	Clk2	1.2	0.0254275
1452954_at	Ube2c	1.2	0.0415653
1448233_at	Prnp	1.2	0.0153768
1424381_at	Sf4	-1.2	0.0461642
1424293_s_at	Tmem55a	-1.3	0.0464795
1419553_a_at	Rabggtb	-1.3	0.0487711
1419290_at	Mettl6	-1.3	0.0275627
1455305_x_at	Hnrnpa1	-1.3	0.0364577
1420965_a_at	Enc1	-1.4	0.0380139
1423095_s_at	Crbn	-1.4	0.0225356
1428666_at	Nars	-1.4	0.016327
1436735_at	Nsun3	-1.4	0.0461642
1416064_a_at	Hspa5	-1.4	0.0254275
1434660_at	Alkbh1	-1.4	0.0461642
1434488_at	Arfrp1	-1.5	0.0461642
1434087_at	Mthfr	-1.5	0.0411318
1430991_at	1810014B01Rik	-1.5	0.0491365
1456422_at	Dennd5b	-1.5	0.0247114
1435458_at	Pim1	-1.5	0.0461642
1424489_a_at	Trit1	-1.5	0.0470419
1453287_at	Ankrd33b	-1.6	0.0483422
1432826_a_at	Cd80	-1.6	0.0461642
1440076_at		-1.6	0.0257609
1450264_a_at	Chka	-1.6	0.0461642
1451004_at	Acvr2a	-1.6	0.016327
1419291_x_at	Gas5	-1.6	0.0204313
1433699_at	Tnfaip3	-1.7	0.016327
1425364_a_at	Slc3a2	-1.7	0.0254275
1449546_a_at	Zfp617	-1.7	0.0380139
1427005_at	Plk2	-1.7	0.00397531
1441737_s_at	Rassf1	-1.8	0.0461642
1436763_a_at	Klf9	-1.8	0.0290918
1450957_a_at	Sqstm1	-1.8	0.0461642
1447936_at		-1.8	0.0494938
1418640_at	Sirt1	-1.9	0.0461642
1428288_at	Klf9	-1.9	0.0254275
1448185_at	Herpud1	-2	0.0086066
1435626_a_at	Herpud1	-2	0.00603744
1434574_at	9430008C03Rik	-2	0.0486925
1436424_at	1600020E01Rik	-2	0.0461642
1447361_at		-2	0.0415653
1440457_at		-2	0.0302414
1420618_at	Cpeb4	-2	0.0125067
1443233_at		-2	0.038666
1430077_at	Sfrs11	-2.1	0.016327
1434350_at	Csrnp1	-2.2	0.00603744
1447923_at	1810026B05Rik	-2.2	0.0461642
1456225_x_at	Trib3	-2.2	0.02372
1451382_at	Chac1	-2.3	0.00397531
1452324_at	Pvt1	-2.3	0.0166684
1439787_at	P2rx7	-2.3	0.0235881
1423605_a_at	Mdm2	-2.3	0.0378788
1453344_at	1810032O08Rik	-2.3	0.0461642
1448325_at	Myd116	-2.3	0.0411318
1431352_s_at	Pvt1	-2.4	0.0461642
1436040_at	Snora44	-2.4	0.0248556
1415996_at	Txnip	-2.5	0.0302414
1419296_at	Arhgap4	-2.5	0.0317251
1431039_at	Otud4	-2.5	0.0328934
1439478_at	Acot2	-2.6	0.00397531
1435158_at	Rbm12b	-2.6	0.00603744
1435174_at	LOC100045795 /// Rsbn1	-2.6	0.0424322
1443167_at		-2.7	0.0401603
1426065_a_at	Trib3	-2.8	0.0257609
1458345_s_at	Colec11	-3	0.0461642
1428171_at	Prpf39	-3.1	0.0487711
1457435_x_at	Myom2	-3.2	0.016327
1453851_a_at	Gadd45g	-3.2	0.000338
1449519_at	Gadd45a	-3.4	0.0247114
1416926_at	Trp53inp1	-3.4	0.0273777
1417516_at	Ddit3	-3.9	0.00603744
1418203_at	Pmaip1	-3.9	0.0381191
1436058_at	Rsad2	-4.3	0.0254275
1421001_a_at	Car6	-4.9	0.0401603
1421009_at	Rsad2	-5.2	0.0463953
1449363_at	Atf3	-5.3	0.00498611
1445678_at		-6.1	0.016327
1450297_at	Il6	-8.1	0.00214988
1418930_at	Cxcl10	-9.6	0.02372
