# Supplementary material for: DUX4 Differentially Regulates Transcriptomes of Human Rhabdomyosarcoma and Mouse C2C12 Cells
Source: PLoS One. 2013 May 22;8(5):e64691. doi: 10.1371/journal.pone.0064691 (PMC3661531; doi:10.1371/journal.pone.0064691)
Supplement: Table S3 — Common transcripts regulated by DUX4 in RD and C2C12 cells. Genespring GX 11.0 was used to identify transcripts regulated by DUX4 in both RD and C2C12 cells (p<0.05). (XLSX) [file pone.0064691.s003.xlsx]

## Sheet: Sheet1
Table S3: Common transcripts regulated by DUX4 in RD and C2C12 cells
Gene Symbol	Fold Change (RD)	Fold Change (C2C12)
Uts2	75.6	224.4
Pcyox1	1.8	1.3
Ccng2	1.7	1.6
Rcan2	1.7	2.3
Clk2	1.6	1.2
Trib2	1.6	2.1
Lmo4	1.5	1.8
Cdkn2c	1.5	1.7
Tmem19	1.4	2.1
Tmem19	1.4	1.6
Ube2c	1.3	1.2
Ndrg3	1.3	1.3
Gnai1	1.2	2.5
Nhsl1	1.2	1.6
Dennd5b	-1.2	-1.5
Hspa5	-1.3	-1.4
Plk2	-1.3	-1.7
Rabggtb	-1.3	-1.3
Herpud1	-1.6	-2
Herpud1	-1.6	-2
Pim1	-1.6	-1.5
Slc3a2	-1.6	-1.7
Chac1	-1.7	-2.3
Il6	-1.8	-8.1
Gadd45a	-1.8	-3.4
Ddit3	-2.1	-3.9
Txnip	-2.3	-2.5
Myd116	-2.4	-2.3
Trib3	-2.6	-2.2
Trib3	-2.6	-2.8
Atf3	-2.6	-5.3
Tnfaip3	-3.8	-1.7
Cxcl10	2.3	-9.6
Rsad2	1.4	-5.2
Rsad2	1.4	-4.3
Mtap4	-1.2	1.3
Pts	-1.3	1.4
Nt5e	-1.3	1.6
Dusp10	-1.6	1.6
Lmcd1	-2	6.4
