# Supplementary material for: DUX4 Differentially Regulates Transcriptomes of Human Rhabdomyosarcoma and Mouse C2C12 Cells
Source: PLoS One. 2013 May 22;8(5):e64691. doi: 10.1371/journal.pone.0064691 (PMC3661531; doi:10.1371/journal.pone.0064691)
Supplement: Table S4 — Transcripts functioning in immune response pathways regulated by DUX4 in RD cells. Transcripts identified in the top ranked canonical pathway regulated by DUX4 in RD cells were identified through IPA. (XLSX) [file pone.0064691.s004.xlsx]

## Sheet: Sheet1
Table S4: Transcripts functioning in immune response pathways regulated by DUX4 in RD cells
Gene Symbol	Fold Change
PGF	1.687
PRKCQ	1.672
GSK3B	1.663
FZD7	1.649
CCL5	1.641
NFATC4	1.614
FZD1	1.579
PLCG2	1.538
MAPKAPK2	1.526
FZD4	1.506
FZD2	1.5
FOS	1.398
WNT5A	1.398
PRKD1	1.245
CALM1 (includes others)	1.186
CAMK2D	1.175
PPP3CB	-1.164
ATF2	-1.257
CCND1	-1.282
CEBPD	-1.286
RAF1	-1.286
NRAS	-1.349
NFATC2	-1.355
CREB1	-1.392
MAP2K3	-1.395
IL15	-1.441
PPP3CC	-1.444
PRKCA	-1.454
CEBPB	-1.461
VEGFC	-1.473
FZD5	-1.482
NFKBIA	-1.486
NFATC1	-1.546
NFKBIE	-1.659
SOCS3	-1.676
RRAS2	-1.705
VEGFA	-1.71
PPP3R1	-1.738
IL6ST	-1.77
IL6	-1.785
CSNK1A1	-1.799
IL6R	-1.949
CEBPG	-1.983
FGF2	-2.041
JUN	-2.122
IL8	-2.366
