# Supplementary material for: DUX4 Differentially Regulates Transcriptomes of Human Rhabdomyosarcoma and Mouse C2C12 Cells
Source: PLoS One. 2013 May 22;8(5):e64691. doi: 10.1371/journal.pone.0064691 (PMC3661531; doi:10.1371/journal.pone.0064691)
Supplement: Table S5 — Transcripts functioning in BMP signaling pathway regulated by DUX4 in RD cells. Transcripts functioning in BMP signaling pathway, the second ranked canonical pathway regulated by DUX4 in RD cells, were identified through IPA. (XLSX) [file pone.0064691.s005.xlsx]

## Sheet: Sheet1
Table S5: Transcripts functioning in BMP signaling pathway regulated by DUX4 in RD cells
Gene Symbol	Fold Change
Pro-BMP signaling
ZN423	3.512
BMPR1A	1.41
SMAD9	1.307
SMAD1	1.246
ATF2	-1.257
RAF1	-1.286
NRAS	-1.349
CREB1	-1.392
NFKB2	-1.78
HOXC9	-1.868
JUN	-2.122
Anti-BMP signaling
SMAD6	1.789
NOG	1.628
SMURF1	-1.258
FST	-2.25
Function not clear
PRKAR1A	1.401
RRAS2	-1.705
