# Supplementary material for: DUX4 Differentially Regulates Transcriptomes of Human Rhabdomyosarcoma and Mouse C2C12 Cells
Source: PLoS One. 2013 May 22;8(5):e64691. doi: 10.1371/journal.pone.0064691 (PMC3661531; doi:10.1371/journal.pone.0064691)
Supplement: Table S6 — Transcripts functioning in NRF2 mediated oxidative stress response pathway regulated by DUX4 in RD cells. Transcripts functioning in NRF2 mediated oxidative stress response pathway, the third ranked canonical pathway regulated by DUX4 in RD cells, were identified through IPA. (XLSX) [file pone.0064691.s006.xlsx]

## Sheet: Sheet1
Table S6: Transcripts functioning in NRF2 mediated oxidative stress response pathway regulated by DUX4 in RD cells
Gene Symbol	Fold Change
Anti-oxidative stress
MAF	2
MAP2K5	1.9
CBR1	1.5
FTH1	1.5
GSTM3	1.5
MGST2	1.5
FOS	1.4
ACTC1	1.3
NQO1	1.3
NQO2	1.2
RAF1	-1.3
DNAJB2	-1.4
GCLM	-1.4
MAP2K3	-1.4
MAFG	-1.4
DNAJB9	-1.6
HERPUD1	-1.6
FOSL1	-1.8
HSPB8	-1.8
SOD2	-1.8
MAFK	-2.2
BACH1	-2.4
MAFF	-2.7
Pro-oxidative stress
GSK3B	1.7
PRKCQ	1.7
RBX1	1.4
PRKD1	1.2
NRAS	-1.3
PRKCA	-1.5
JUN	-2.1
Function not clear
RRAS2	-1.7
